# Supplementary material for: Crystalline thieno[3,2-b]thiophene-dioxide-diyl bridged molecular gyrotops as fluorescent dielectric materials
Source: Royal Society of Chemistry journal article supplement (doi:10.1039/d1tc00808k), 2021-01-01
Supplement: d1tc00808k1.pdf [file d1tc00808k1.pdf]

## Supplementary Information

### **Crystalline Thieno[3,2-*b*]thiophene-dioxide-diyl bridged Molecular Gyrotops as Fluorescent Dielectric Materials**

Daiki Hayashi <sup>a</sup> Yusuke Inagaki <sup>a</sup> and Wataru Setaka<sup>\*a</sup>

<sup>a</sup> *Division of Applied Chemistry, Faculty of Urban Environmental Sciences, Tokyo Metropolitan  
University, 1-1 Minami-Osawa, Hachioji, Tokyo 192-0397, Japan*

1. **Details of Synthetic Studies**
2. **Copies of <sup>1</sup>H, <sup>13</sup>C, <sup>29</sup>Si NMR, and HRMS Spectra for All New Compounds**
3. **Details of X-Ray Diffraction Studies**
4. **Details of DSC Studies**
5. **Details of Fluorescence Studies**
6. **Details of Temperature Dependent Dielectric Relaxation Studies**
7. **Details of DFT Calculations**

## 1. Details of Synthetic Studies

**General** All the reactions were carried out under an argon or nitrogen atmosphere. The chemical shifts in the  $^1\text{H}$  and  $^{13}\text{C}$  NMR spectra were based on the residual solvent resonances, while those in  $^{29}\text{Si}$  NMR spectra were referenced to external tetramethylsilane. HRMS analyses were carried out using a time-of-flight mass spectrometry (TOF-MS) system with atmospheric pressure chemical ionization (APCI). Preparatory GPC was carried out using chloroform stabilized with ethanol as the eluent. Commercially available reagents were used as received without further purification.

**Synthesis of 2,5-bis(tri(7-octenyl)silyl)thieno[3,2-*b*]thiophene (C8TTC8)** A solution of *n*-BuLi (1.6 M in hexane, 20 mL, 2.2 equiv) was added to a THF (20 mL) solution of thieno[3,2-*b*]thiophene (1.9 g, 13.5 mmol) slowly at  $-78\text{ }^\circ\text{C}$ , and then the reaction temperature was raised to room temperature and stirring was continued for 3 h. To the mixture was added tri(7-octenyl)chlorosilane (13.2 g, 31.3 mmol) at  $-78\text{ }^\circ\text{C}$ , and then the reaction was stirred for 20 h at room temperature. The mixture was then hydrolyzed and extracted with hexane. The organic layer was washed with a saturated aqueous NaCl solution and dried over anhydrous  $\text{Na}_2\text{SO}_4$ . Silica gel column chromatography (hexane as the eluent) of the concentrated residue afforded the crude product as a colorless oil. Pure **C8TTC8** (4.2 g, 4.1 mmol, 30% yield) was obtained as a colorless oil after GPC purification. **C8TTC8**: a colorless oil;  $^1\text{H}$  NMR ( $\text{CDCl}_3$ , 500 MHz):  $\delta$  7.27 (s, 1H, thienothiophene (TT)), 5.79 (ddt,  $J = 17.0, 10.2, 6.8$  Hz, 3H,  $\text{H}_2\text{C}=\text{CH}-$ ), 4.98 (d,  $J = 20.0$  Hz, 3H,  $\text{H}_2\text{C}=\text{CH}-$ ), 4.91 (d,  $J = 10.0$  Hz, 3H,  $\text{H}_2\text{C}=\text{CH}-$ ), 2.01 (q,  $J = 7.0$  Hz, 6H,  $\text{H}_2\text{C}=\text{CH}-\text{CH}_2-$ ), 1.27-1.37 (br, 24H), 0.79 (t,  $J = 8.0$  Hz, 6H,  $-\text{Si}-(\text{CH}_2)-$ );  $^{13}\text{C}\{^1\text{H}\}$  NMR ( $\text{CDCl}_3$ , 126 MHz):  $\delta$  146.6 ( $\text{C}_{\text{Ar}}$ ), 142.0 ( $\text{C}_{\text{Ar}}$ ), 139.2, 125.7 ( $\text{C}_{\text{Ar}}$ ), 114.1, 33.8, 33.6, 28.9, 28.7, 23.7, 13.4;  $^{29}\text{Si}\{^1\text{H}\}$  NMR ( $\text{CDCl}_3$ , 99 MHz):  $\delta$  -3.2; HRMS (APCI)  $m/z$ :  $[\text{M}]^+$  Calcd for  $\text{C}_{54}\text{H}_{92}\text{Si}_2\text{S}_2$  860.6173; Found: 860.6177.

**Synthesis of 2,5-bis(tri(9-decenyl)silyl)thieno[3,2-*b*]thiophene (C10TTC10)** Bissilylnaphthalene **C10TTC10** was synthesized by the same procedure as **C8TTC8**. In this case, the following reagents were used: thieno[3,2-*b*]thiophene (2.0 g, 14.5 mmol), THF (20 mL), *n*-BuLi solution (1.6 M in hexane, 20.6 mL, 2.2 equiv.), and tri(9-decenyl)chlorosilane (16.4 g, 32.0 mmol). Pure compound **C10TTC10** (5.6 g, 5.2 mmol, 37% yield) was obtained as a colorless oil after GPC purification of the crude products. **C10TTC10**: a colorless oil;  $^1\text{H}$  NMR ( $\text{CDCl}_3$ , 500 MHz):  $\delta$  7.27 (s, 1H, TT), 5.84 (ddt,  $J = 17.2, 10.1, 6.7$  Hz, 3H,  $\text{H}_2\text{C}=\text{CH}-$ ), 5.02 (d,  $J = 16.9$  Hz, 3H,  $\text{H}_2\text{C}=\text{CH}-$ ), 4.95 (d,  $J = 10.1$  Hz, 3H,  $\text{H}_2\text{C}=\text{CH}-$ ), 2.02 (q,  $J = 7.3$  Hz, 6H,  $\text{H}_2\text{C}=\text{CH}-\text{CH}_2-$ ), 1.25-1.35 (br, 36H), 0.79 (t,  $J = 6.5$  Hz, 6H,  $\text{Si}-\text{CH}_2-$ );  $^{13}\text{C}\{^1\text{H}\}$  NMR ( $\text{CDCl}_3$ , 126 MHz):  $\delta$  146.6 ( $\text{C}_{\text{Ar}}$ ), 142.1 ( $\text{C}_{\text{Ar}}$ ), 125.7 ( $\text{C}_{\text{Ar}}$ ), 139.2, 114.1, 33.8, 33.7, 29.4, 29.2, 29.0, 23.8, 13.4;  $^{29}\text{Si}\{^1\text{H}\}$  NMR ( $\text{CDCl}_3$ , 99 MHz):  $\delta$  -3.2; HRMS (APCI)  $m/z$ :  $[\text{M} + \text{H}]^+$  Calcd for  $\text{C}_{66}\text{H}_{116}\text{S}_2\text{Si}_2$  1029.8080; Found 1029.8130.

**Synthesis of 2,5-bis(tri(9-decenyl)silyl)thieno[3,2-*b*]thiophene (C12TTC12)** Bissilylnaphthalene **C12TTC12** was synthesized by the same procedure as **C8TTC8**. In this case, the following reagents were used: thieno[3,2-*b*]thiophene (1.9 g, 13.8 mmol), THF (20 mL), *n*-BuLi solution (1.6 M in hexane, 20.5 mL, 2.2 equiv.), and tri(9-decenyl)chlorosilane (22.5 g, 31.8 mmol). Pure compound **C12TTC12** (4.6 g, 3.9 mmol, 28% yield) was obtained as a colorless oil after GPC purification of the crude products. **C12TTC12**: a colorless oil;  $^1\text{H}$  NMR ( $\text{CDCl}_3$ , 500 MHz):  $\delta$  7.27 (s, 1H, TT), 5.59 (ddt,  $J = 17.0, 10.5, 6.8$  Hz, 3H,  $\text{H}_2\text{C}=\text{CH}-$ ), 4.97 (d,  $J = 17.1$  Hz, 3H,  $\text{H}_2\text{C}=\text{CH}-$ ), 4.91 (d,  $J = 10.4$  Hz, 3H,  $\text{H}_2\text{C}=\text{CH}-$ ), 2.02 (q,  $J = 7.0$  Hz, 6H,  $\text{H}_2\text{C}=\text{CH}-\text{CH}_2-$ ), 1.12-1.35 (br, 48H), 0.78 (t,  $J = 6.6$  Hz, 6H,  $\text{Si}-\text{CH}_2-$ );  $^{13}\text{C}\{^1\text{H}\}$  NMR ( $\text{CDCl}_3$ , 126 MHz):  $\delta$  146.6 ( $\text{C}_{\text{Ar}}$ ), 142.1 ( $\text{C}_{\text{Ar}}$ ), 139.3, 125.7 ( $\text{C}_{\text{Ar}}$ ), 114.1, 33.8, 33.7, 29.6(duplicated), 29.5, 29.2(duplicated), 29.0, 23.8, 13.4;  $^{29}\text{Si}\{^1\text{H}\}$  NMR ( $\text{CDCl}_3$ , 99 MHz):  $\delta$  -3.2; HRMS (APCI)  $m/z$ :  $[\text{M} + \text{H}]^+$  Calcd for  $\text{C}_{78}\text{H}_{140}\text{S}_2\text{Si}_2$  1196.9930; Found 1196.9947.

**Synthesis of molecular gyrotop C14TT and its isomer, C14iTT** To dichloromethane (500 mL) containing the first-generation Grubbs' catalyst (0.05 g, 0.06 mmol) under reflux was added 2,5-bissilylthieno[3,2-*b*]thiophene **C8TTC8** (750 mg, 0.87 mmol) in dichloromethane (200 mL) dropwise with stirring over 8 h, and then the mixture was stirred further for 12 h. The volatile materials were removed in vacuo, and the metal catalyst was removed from the toluene-soluble fraction following flash column chromatography (silica gel, toluene). Hydrogen gas (3 atm) was then introduced to a solution of toluene (5 mL) and the reaction mixture in the presence of 10% Pd/C (0.10 g) in an autoclave, and the mixture was allowed to stand for 72 h at  $60\text{ }^\circ\text{C}$ . After the excess  $\text{H}_2$  gas was released, the mixture was filtered to remove

Pd/C. The volatile materials were removed in vacuo. The fractions containing **C14TT** (85 mg, 0.11 mmol, 12% yield) and **C14iTT** (49 mg, 0.062 mmol, 7% yield) were collected separately using GPC (chloroform) and the solvents were evaporated. **C14TT**: mp 300 °C (decomp.); colorless crystals; <sup>1</sup>H NMR (CDCl<sub>3</sub>, 500 MHz): δ 7.33 (s, 1H, TT), 1.19-1.45 (br, 36H), 0.73-0.76 (br, 6H, Si-CH<sub>2</sub>-); <sup>13</sup>C{<sup>1</sup>H} NMR (CDCl<sub>3</sub>, 126 MHz): δ 146.6 (C<sub>Ar</sub>), 141.0 (C<sub>Ar</sub>), 126.1 (C<sub>Ar</sub>), 32.0, 29.9, 29.7, 28.1, 27.7, 22.4, 13.6; <sup>29</sup>Si{<sup>1</sup>H} NMR (CDCl<sub>3</sub>, 99 MHz): δ -2.2; HRMS (APCI) *m/z*: [M]<sup>+</sup> Calcd for C<sub>48</sub>H<sub>86</sub>Si<sub>2</sub>S<sub>2</sub> 782.5704; Found: 782.5687. **C14iTT**: a colorless oil; <sup>1</sup>H NMR (CDCl<sub>3</sub>, 500 MHz): δ 7.28 (s, 1H, TT), 1.06-1.39 (br, 36H), 0.79-0.91 (br, 4H, Si-CH<sub>2</sub>-), 0.69-0.72 (br, 2H, Si-CH<sub>2</sub>-); <sup>13</sup>C{<sup>1</sup>H} NMR (CDCl<sub>3</sub>, 126 MHz): δ 146.5 (C<sub>Ar</sub>), 142.1 (C<sub>Ar</sub>), 125.7 (C<sub>Ar</sub>), 31.8, 31.5, 29.4, 29.3, 27.8, 27.9, 27.0, 26.9, 26.8, 26.3, 22.4, 22.3, 13.2, 12.7; <sup>29</sup>Si{<sup>1</sup>H} NMR (CDCl<sub>3</sub>, 99 MHz): δ -2.4; HRMS (APCI) *m/z*: [M]<sup>+</sup> Calcd for C<sub>48</sub>H<sub>86</sub>Si<sub>2</sub>S<sub>2</sub> 782.5704; Found: 782.5699.

**Synthesis of the molecular gyrotop C18TT and its isomer C18iTT** Molecular gyrotop **C18TT** and its isomer **C18iTT** were synthesized from **C10TTC10** by the same procedure as **C14TT**. In this case, the following reagents were used: 2,5-bissilylthieno[3,2-b]thiophene **C10TTC10** (1.0 g, 0.82 mmol), first-generation Grubbs' catalyst (0.05 g, 0.06 mmol), and dichloromethane (total 900 mL). Pure compounds **C18TT** (47 mg, 0.41 mmol, 5% yield) and **C18iTT** (270 mg, 0.22 mmol, 27% yield) were obtained after GPC separation and purification of the crude products. **C18TT**: colorless crystals; mp 68.1-68.5 °C; colorless crystals; <sup>1</sup>H NMR (CDCl<sub>3</sub>, 500 MHz): δ 7.34 (s, 1H, TT), 1.12-1.38 (br, 48H), 0.76-0.83 (br, 6H, Si-CH<sub>2</sub>-); <sup>13</sup>C{<sup>1</sup>H} NMR (CDCl<sub>3</sub>, 126 MHz): δ 146.7 (C<sub>Ar</sub>), 141.9 (C<sub>Ar</sub>), 126.0 (C<sub>Ar</sub>), 33.3, 29.4, 29.3, 29.2, 28.8, 28.7, 28.3, 23.6, 13.7; <sup>29</sup>Si{<sup>1</sup>H} NMR (CDCl<sub>3</sub>, 99 MHz): δ -2.8; HRMS (APCI) *m/z*: [M + H]<sup>+</sup> Calcd for C<sub>60</sub>H<sub>111</sub>S<sub>2</sub>Si<sub>2</sub>: 951.7660; Found 951.7638. **C18iTT**: a colorless oil; <sup>1</sup>H NMR (CDCl<sub>3</sub>, 500 MHz) δ 7.29 (s, 1H, TT), 1.20-1.40 (br, 48H), 0.79-0.90 (br, 4H, Si-CH<sub>2</sub>-), 0.71-0.74 (br, 2H, Si-CH<sub>2</sub>-); <sup>13</sup>C{<sup>1</sup>H} NMR (CDCl<sub>3</sub>, 126 MHz): δ 146.6 (C<sub>Ar</sub>), 142.2 (C<sub>Ar</sub>), 125.8 (C<sub>Ar</sub>), 33.6, 33.0, 29.3, 29.1, 28.8 (Two signals are overlapped.), 28.7, 28.4, 28.1 (Two signals are overlapped.), 27.7, 27.4, 23.7, 23.3, 14.1, 13.0; <sup>29</sup>Si{<sup>1</sup>H} NMR (CDCl<sub>3</sub>, 99 MHz): δ -2.8; HRMS (APCI) *m/z*: [M]<sup>+</sup> Calcd for C<sub>60</sub>H<sub>110</sub>S<sub>2</sub>Si<sub>2</sub>: 951.7582; Found 951.7546.

**Synthesis of the molecular gyrotop C22TT and its isomer C22iTT** Molecular gyrotop **C22TT** and its isomer **C22iTT** were synthesized from **C12TTC12** by the same procedure as **C14TT**. In this case, the following reagents were used: 2,5-bissilylthieno[3,2-b]thiophene **C12TTC12** (1.0 g, 0.84 mmol), first-generation Grubbs' catalyst (0.05 g, 0.06 mmol), and dichloromethane (total 900 mL). Pure compounds **C22TT** (160 mg, 0.14 mmol, 16% yield) and **C22iTT** (66 mg, 0.059 mmol, 7% yield) were obtained after GPC separation and purification of the crude products. **C22TT**: colorless crystals; mp 98.4-100.4 °C; colorless crystals; <sup>1</sup>H NMR (CDCl<sub>3</sub>, 500 MHz): δ 7.32 (s, 1H, TT), 1.24-1.36 (br, 60H), 0.76-0.80 (br, 6H, Si-CH<sub>2</sub>-); <sup>13</sup>C{<sup>1</sup>H} NMR (CDCl<sub>3</sub>, 126 MHz): δ 146.6 (C<sub>Ar</sub>), 142.0 (C<sub>Ar</sub>), 125.9 (C<sub>Ar</sub>), 33.7, 29.3 (quintuplicated), 29.1(duplicated), 29.0, 28.9, 23.8, 13.5; <sup>29</sup>Si{<sup>1</sup>H} NMR (CDCl<sub>3</sub>, 99 MHz): δ -3.1; HRMS (APCI) *m/z*: [M + H]<sup>+</sup> Calcd for C<sub>72</sub>H<sub>135</sub>S<sub>2</sub>Si<sub>2</sub>: 1119.9538; Found 1119.9507. **C22iTT**: a colorless oil; <sup>1</sup>H NMR (CDCl<sub>3</sub>, 500 MHz) δ 7.28 (s, 1H, TT), 1.15-1.40 (br, 60H), 0.84-0.87 (br, 4H, Si-CH<sub>2</sub>-), 0.73-0.83 (br, 2H, Si-CH<sub>2</sub>-); <sup>13</sup>C{<sup>1</sup>H} NMR (CDCl<sub>3</sub>, 126 MHz): δ 146.6 (C<sub>Ar</sub>), 142.3 (C<sub>Ar</sub>), 125.7 (C<sub>Ar</sub>), 33.7, 33.3, 29.2(duplicated), 29.1(duplicated), 29.0(duplicated), 28.8, 28.7(duplicated), 28.5, 28.2, 28.0, 23.8, 23.5, 14.0, 13.0; <sup>29</sup>Si{<sup>1</sup>H} NMR (CDCl<sub>3</sub>, 99 MHz): δ -3.0; HRMS (APCI) *m/z*: [M + H]<sup>+</sup> Calcd for C<sub>72</sub>H<sub>135</sub>S<sub>2</sub>Si<sub>2</sub>: 1119.9538; Found 1119.9511.

**Synthesis of molecular gyrotop C14TTO2** Macrocycle **C14TT** (60 mg, 0.077 mmol) and *m*CPBA (140 mg, 0.63 mmol) were dissolved in dry dichloromethane (50 mL). The reaction mixture was then stirred for 48 h at room temperature. The mixture was quenched with a dilute aqueous NaHCO<sub>3</sub> solution and extracted with dichloromethane. The organic layer was washed 10 times with dilute aqueous NaHCO<sub>3</sub> to completely remove chlorobenzoic acid. The mixture was dried over anhydrous Na<sub>2</sub>SO<sub>4</sub> and filtered, and the volatile materials were removed in vacuo. Pure **C14TTO2** (40 mg, 0.049 mmol, 64% yield) was obtained as colorless crystals after recrystallization from ethanol. **C14TTO2**: colorless crystals; mp 380 °C (decomp.); <sup>1</sup>H NMR (CDCl<sub>3</sub>, 500 MHz): δ 7.27 (s, 1H, TT), 7.04 (s, 1H, TT), 1.18-1.46 (br, 72H), 0.76-0.79 (br, 6H, Si-CH<sub>2</sub>-), 0.72-0.75 (br, 6H, Si-CH<sub>2</sub>-); <sup>13</sup>C{<sup>1</sup>H} NMR (CDCl<sub>3</sub>, 126 MHz): δ 12.6, 13.3, 22.1, 22.4, 27.7, 27.9, 28.0, 28.4, 29.5, 29.9, 29.9, 29.95, 32.0, 32.1, 126.7 (C<sub>Ar</sub>), 132.1 (C<sub>Ar</sub>), 144.1 (C<sub>Ar</sub>), 146.9 (C<sub>Ar</sub>), 147.4 (C<sub>Ar</sub>), 149.6 (C<sub>Ar</sub>); <sup>29</sup>Si{<sup>1</sup>H} NMR (CDCl<sub>3</sub>, 99 MHz) δ -0.5, -0.8; HRMS (APCI) *m/z*: [M]<sup>+</sup> Calcd for C<sub>48</sub>H<sub>86</sub>S<sub>2</sub>Si<sub>2</sub>O<sub>2</sub>: 815.5681; Found 815.5668.

**Synthesis of molecular gyrotop C18TTO2** Macrocycle **C18TT** was synthesized via the same procedure as that for **C14TTO2**. In this case, molecular gyrotop **C18TT** (136 mg, 0.14 mmol), *m*CPBA

(257 g, 1.14 mmol), and dichloromethane (50 mL) were used. Pure **C18TTO2** (120 mg, 0.12 mmol, 83% yield) was obtained as colorless crystals after recrystallization from ethanol. **C18TTO2**: colorless crystals; mp 85.3-86.7 °C;  $^1\text{H}$  NMR ( $\text{CD}_2\text{Cl}_2$ , 500 MHz):  $\delta$  7.27 (s, 1H, TT), 7.10 (s, 1H, TT), 1.26-1.42 (br, 96H), 0.78-0.84 (br, 12H, Si- $\text{CH}_2$ -);  $^{13}\text{C}\{^1\text{H}\}$  NMR ( $\text{CD}_2\text{Cl}_2$ , 126 MHz):  $\delta$  149.2 ( $\text{C}_{\text{Ar}}$ ), 148.3 ( $\text{C}_{\text{Ar}}$ ), 147.3 ( $\text{C}_{\text{Ar}}$ ), 143.9 ( $\text{C}_{\text{Ar}}$ ), 132.5 ( $\text{C}_{\text{Ar}}$ ), 125.8 ( $\text{C}_{\text{Ar}}$ ), 33.2, 33.1, 29.7, 29.5, 29.4, 29.3, 29.2, 29.1, 28.9, 28.8, 28.7, 28.6, 28.3, 28.2, 23.4, 23.1, 13.3, 11.9;  $^{29}\text{Si}\{^1\text{H}\}$  NMR ( $\text{CD}_2\text{Cl}_2$ , 99 MHz)  $\delta$  -1.6, -1.8; HRMS (APCI)  $m/z$ :  $[\text{M} + \text{H}]^+$  Calcd for  $\text{C}_{60}\text{H}_{111}\text{S}_2\text{Si}_2\text{O}_2$ : 983.7559; Found 983.7581.

**Synthesis of molecular gyrotop C22TTO2** Macrocycle **C22TTO2** was synthesized via the same procedure as that for **C14TTO2**. In this case, molecular gyrotop **C22TT** (130 mg, 0.12 mmol), *m*CPBA (213 mg, 0.95 mmol), and dichloromethane (50 mL) were used. Pure **C18TTO2** (130 mg, 0.11 mmol, 97% yield) was obtained as colorless crystals after recrystallization from ethanol. **C18TTO2**: colorless crystals; mp 104.1-105.3 °C;  $^1\text{H}$  NMR ( $\text{CDCl}_3$ , 500 MHz):  $\delta$  7.25 (s, 1H, TT), 7.05 (s, 1H, TT), 1.24-1.38 (br, 120H), 0.83-0.86 (br, 6H, Si- $\text{CH}_2$ -), 0.74-0.81 (br, 6H, Si- $\text{CH}_2$ -);  $^{13}\text{C}\{^1\text{H}\}$  NMR ( $\text{CDCl}_3$ , 126 MHz):  $\delta$  149.3 ( $\text{C}_{\text{Ar}}$ ), 148.2 ( $\text{C}_{\text{Ar}}$ ), 147.2 ( $\text{C}_{\text{Ar}}$ ), 143.8 ( $\text{C}_{\text{Ar}}$ ), 132.4 ( $\text{C}_{\text{Ar}}$ ), 126.2 ( $\text{C}_{\text{Ar}}$ ), 33.7, 33.6, 29.5, 29.4(triplicated), 29.3(triplicated), 29.2, 29.1(triplicated), 28.9(duplicated), 23.7, 23.4, 13.3;  $^{29}\text{Si}\{^1\text{H}\}$  NMR ( $\text{CD}_2\text{Cl}_2$ , 99 MHz)  $\delta$  -2.2; HRMS (APCI)  $m/z$ :  $[\text{M} + \text{H}]^+$  Calcd for  $\text{C}_{72}\text{H}_{135}\text{S}_2\text{Si}_2\text{O}_2$ : 1119.9538; Found 1119.9511.

**Synthesis of 2,5-bis(trimethylsilyl)thieno[3,2-b]thiophene (TMSTT)** Bissilylnaphthalene **TMSTT** was synthesized by the same procedure as **C8TTC8**. In this case, the following reagents were used: thieno[3,2-b]thiophene (1.50 g, 10.7 mmol), THF (20 mL), *n*-BuLi solution (1.6 M in hexane, 15.2 mL, 2.3 equiv.), and trimethylchlorosilane (3.30 g, 29.9 mmol). Pure compound **TMSTT** (1.1 g, 3.9 mmol, 36% yield) was obtained as colorless crystals after column chromatography purification of the crude products. **TMSTT**: colorless crystals; mp 119.4-120.8 °C; colorless crystals;  $^1\text{H}$  NMR ( $\text{CDCl}_3$ , 500 MHz):  $\delta$  7.30 (s, 1H, TT), 0.32 (s, 9H, Si- $\text{CH}_3$ -);  $^{13}\text{C}\{^1\text{H}\}$  NMR ( $\text{CDCl}_3$ , 126 MHz):  $\delta$  146.6 ( $\text{C}_{\text{Ar}}$ ), 144.9 ( $\text{C}_{\text{Ar}}$ ), 125.2 ( $\text{C}_{\text{Ar}}$ ), 0.2 (Me);  $^{29}\text{Si}\{^1\text{H}\}$  NMR ( $\text{CDCl}_3$ , 99 MHz):  $\delta$  -5.8; HRMS (APCI)  $m/z$ :  $[\text{M}]^+$  Calcd for  $\text{C}_{12}\text{H}_{20}\text{S}_2\text{Si}_2$ : 284.0539; Found 284.0529.

**Synthesis of 2,5-bis(tri(7-octenyl)silyl)thieno[3,2-b]thiophene-1,1-dioxide (TMSTTO2)** Thienothiophene-dioxide **TMSTTO2** was synthesized by the same procedure as **C14TTO2**. In this case, thienothiophene **TMSTT** (0.20 g, 0.70 mmol), *m*CPBA (1.3 g, 5.6 mmol), and  $\text{CH}_2\text{Cl}_2$  (30 mL) were used. Pure compound of **TMSTT** (0.092 g, 0.29 mmol, 42% yield) was obtained as colorless crystals after recrystallization from ethanol solution. **TMSTTO2**: mp 141.4-143.0 °C; colorless crystals  $^1\text{H}$  NMR ( $\text{CDCl}_3$ , 500 MHz):  $\delta$  7.25 (s, 1H, TT), 7.02 (s, 1H, TT), 0.36 (s, 9H, Si- $\text{CH}_3$ ), 0.31 (s, 9H, Si- $\text{CH}_3$ );  $^{13}\text{C}\{^1\text{H}\}$  NMR ( $\text{CDCl}_3$ , 126 MHz):  $\delta$  150.9 ( $\text{C}_{\text{Ar}}$ ), 150.8 ( $\text{C}_{\text{Ar}}$ ), 147.3 ( $\text{C}_{\text{Ar}}$ ), 143.9 ( $\text{C}_{\text{Ar}}$ ), 131.4 ( $\text{C}_{\text{Ar}}$ ), 125.5 ( $\text{C}_{\text{Ar}}$ ), -0.4, -1.5;  $^{29}\text{Si}\{^1\text{H}\}$  NMR ( $\text{CDCl}_3$ , 99 MHz):  $\delta$  -4.6, -5.6; HRMS (APCI)  $m/z$ :  $[\text{M} + \text{H}]^+$  Calcd for  $\text{C}_{12}\text{H}_{21}\text{S}_2\text{Si}_2\text{O}_2$ : 317.0516; Found 317.0503.

## 2. Copies of $^1\text{H}$ , $^{13}\text{C}$ , $^{29}\text{Si}$ NMR, and HRMS Spectra for All New Compounds

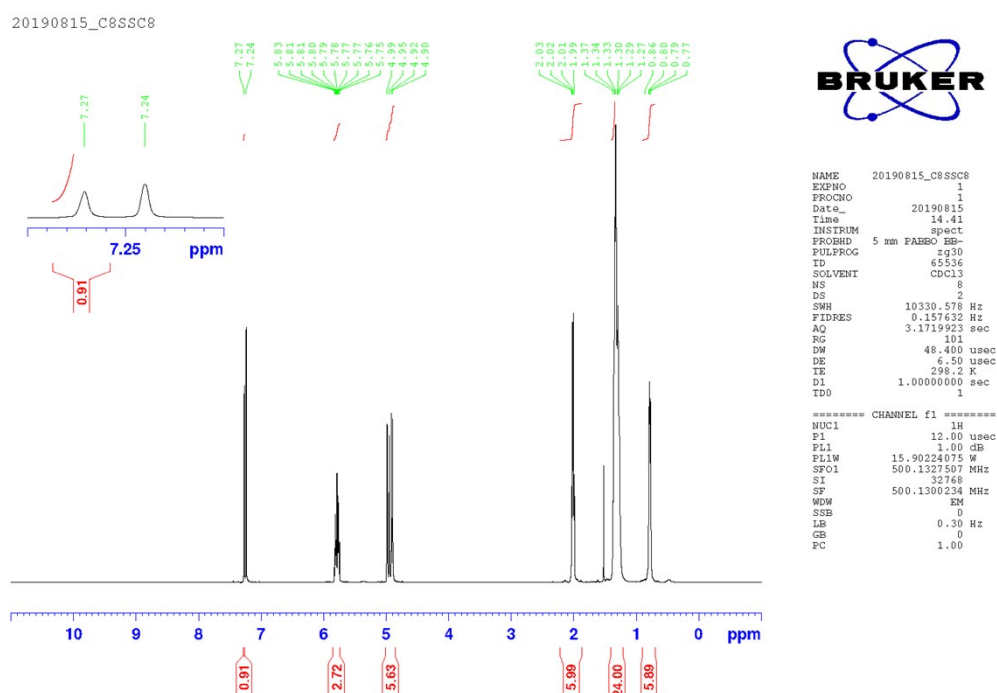

**Fig. S1.**  $^1\text{H}$  NMR spectrum of 2,5-bis(tri(7-octenyl)silyl)thieno[3,2-b]thiophene (**C8TTC8**) in  $\text{CDCl}_3$ .

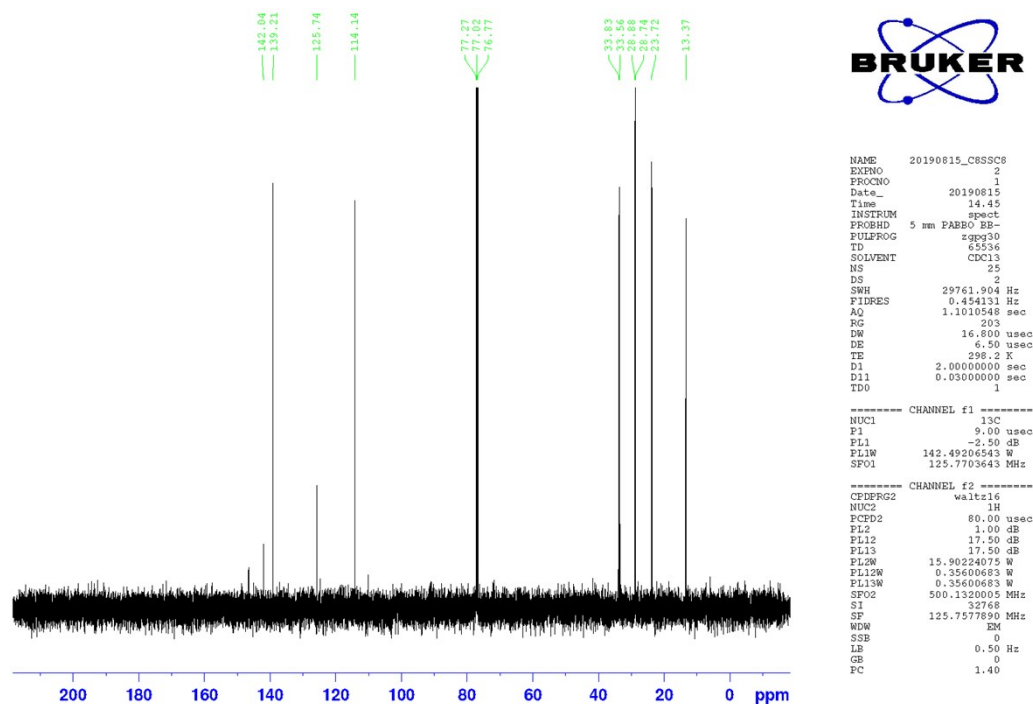

**Fig. S2.**  $^{13}\text{C}$  NMR spectrum of 2,5-bis(tri(7-octenyl)silyl)thieno[3,2-b]thiophene (**C8TTC8**) in  $\text{CDCl}_3$ .

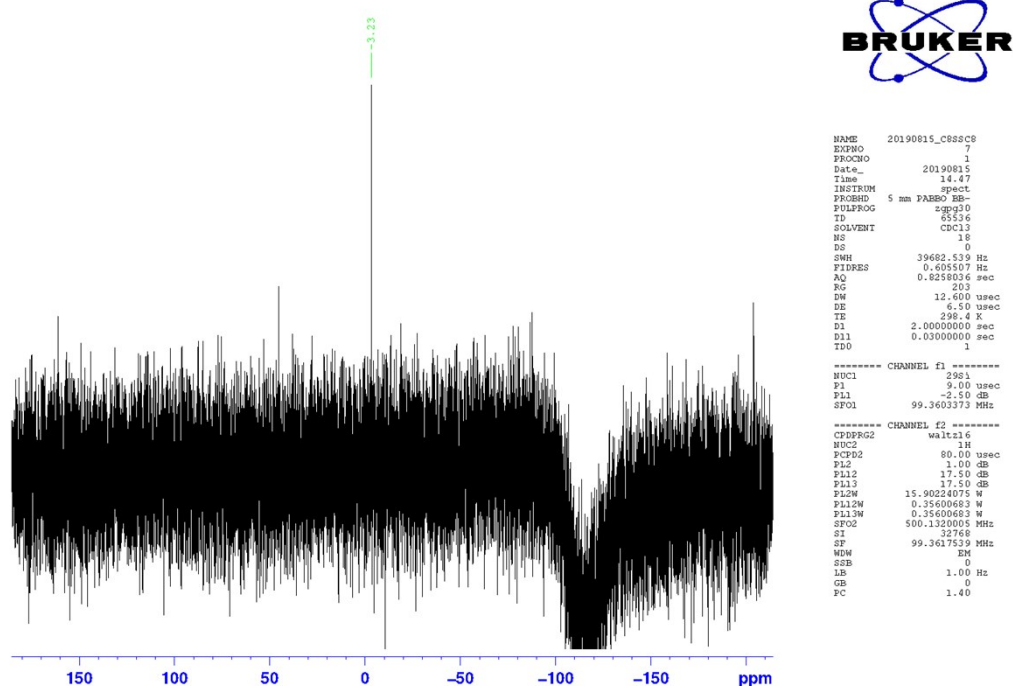

**Fig. S3.**  $^{29}\text{Si}$  NMR spectrum of 2,5-bis(tri(7-octenyl)silyl)thieno[3,2-b]thiophene (**C8TTC8**) in  $\text{CDCl}_3$ .

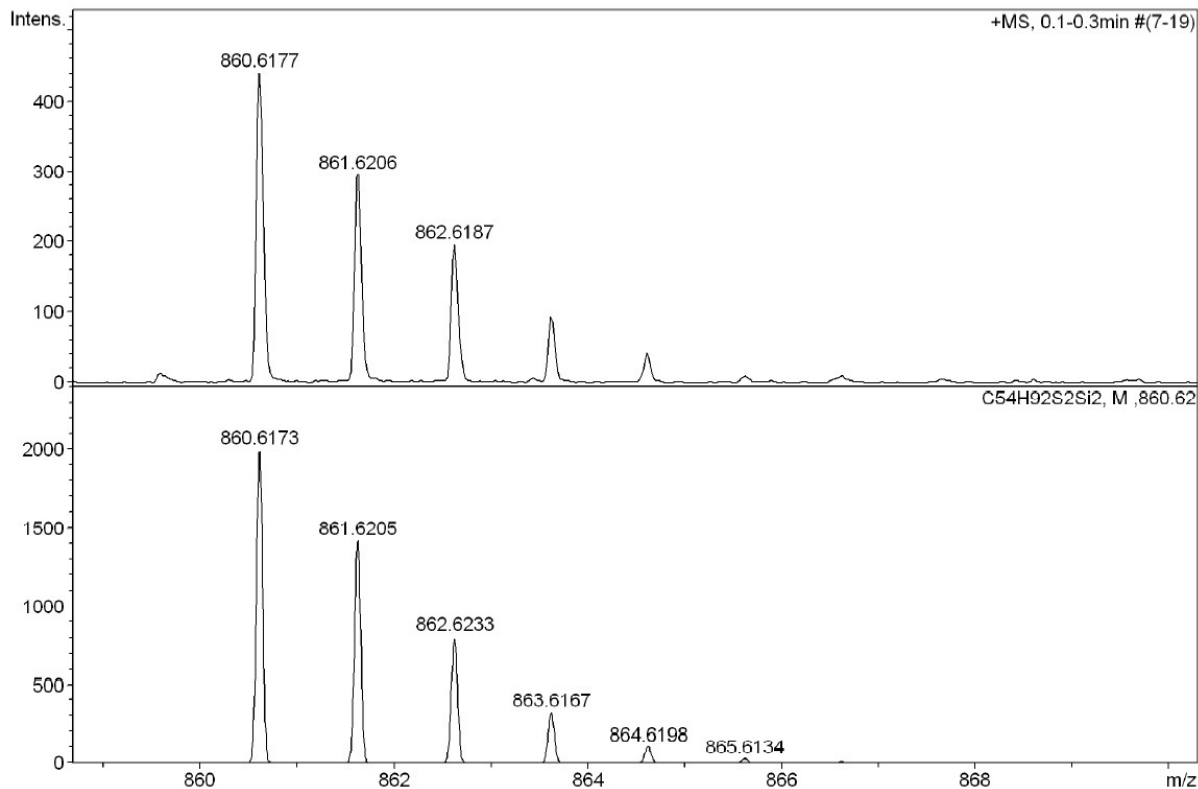

**Fig. S4.** HRMS spectrum of 2,5-bis(tri(7-octenyl)silyl)thieno[3,2-b]thiophene (**C8TTC8**) (APCI, positive). Top: obsd. Bottom: sim.

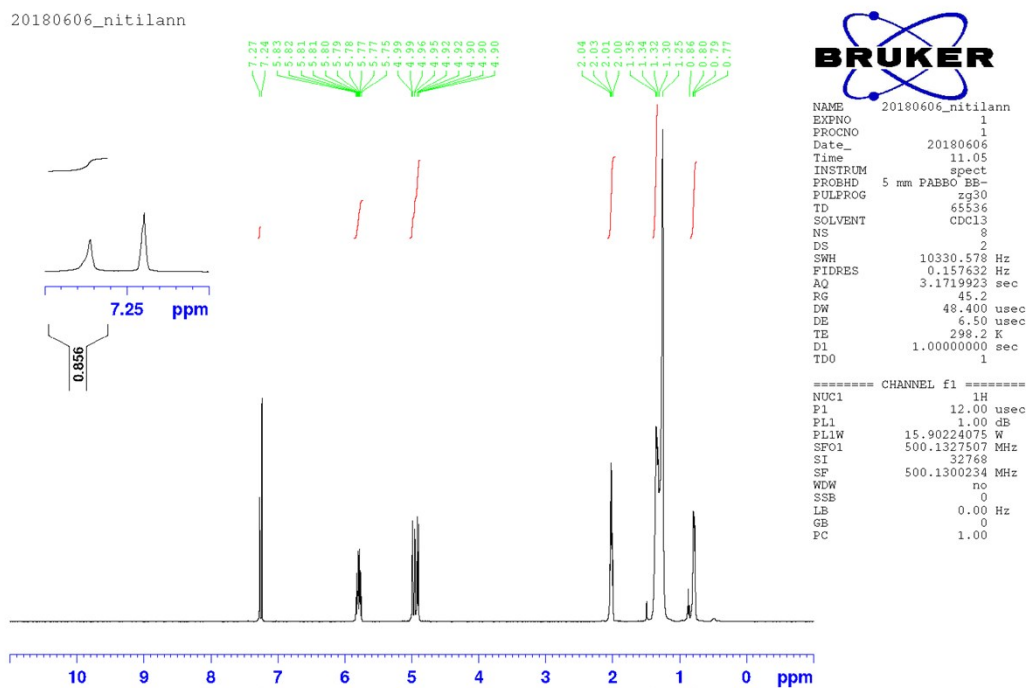

**Fig. S5.**  $^1\text{H}$  NMR spectrum of 2,5-bis(tri(9-decenyl)silyl)thieno[3,2-b]thiophene (C10TTC10) in  $\text{CDCl}_3$ .

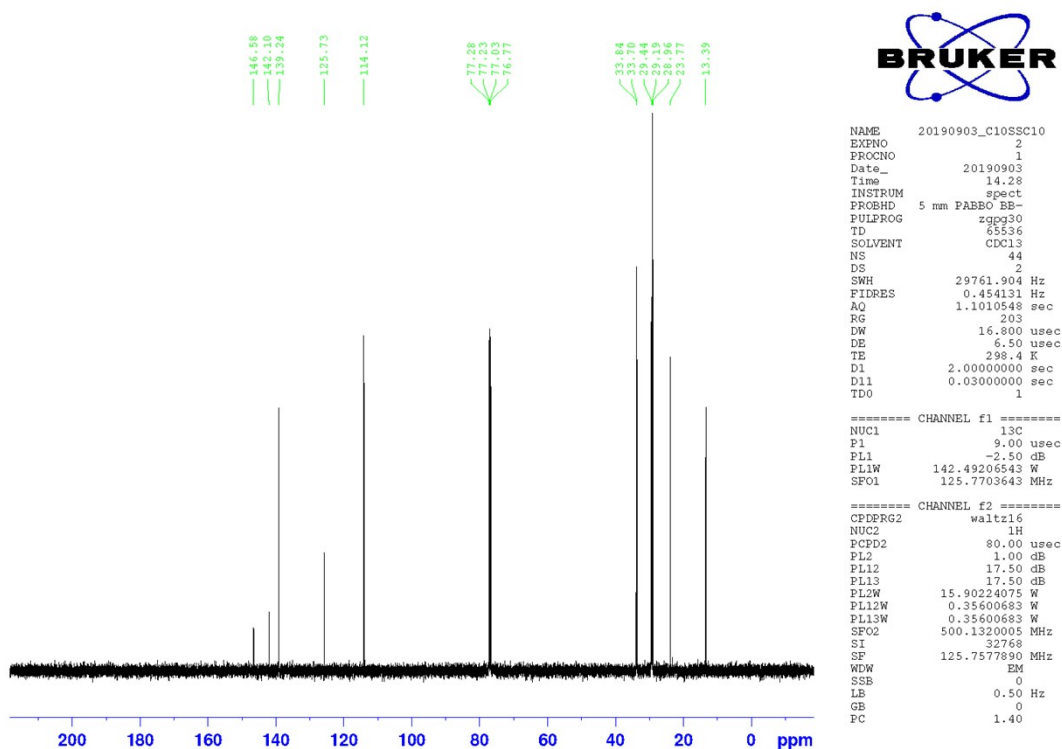

**Fig. S6.**  $^{13}\text{C}$  NMR spectrum of 2,5-bis(tri(9-decenyl)silyl)thieno[3,2-b]thiophene (C10TTC10) in  $\text{CDCl}_3$ .

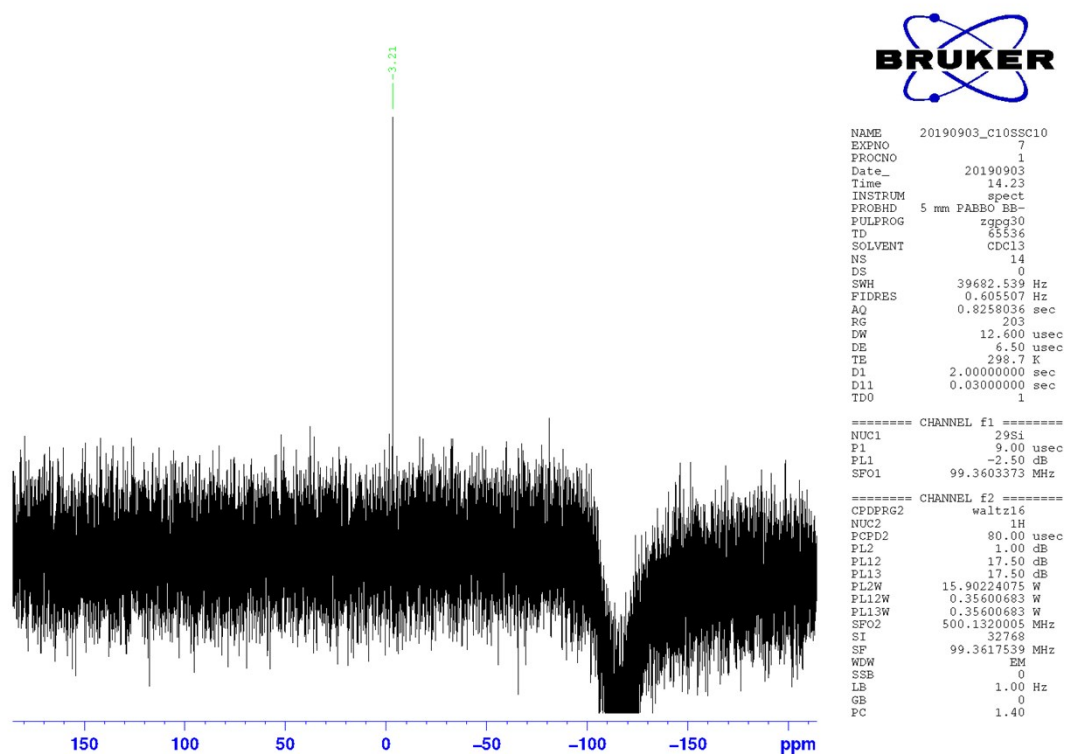

**Fig. S7.**  $^{29}\text{Si}$  NMR spectrum of 2,5-bis(tri(9-decenyl)silyl)thieno[3,2-b]thiophene (**C10TTC10**) in  $\text{CDCl}_3$ .

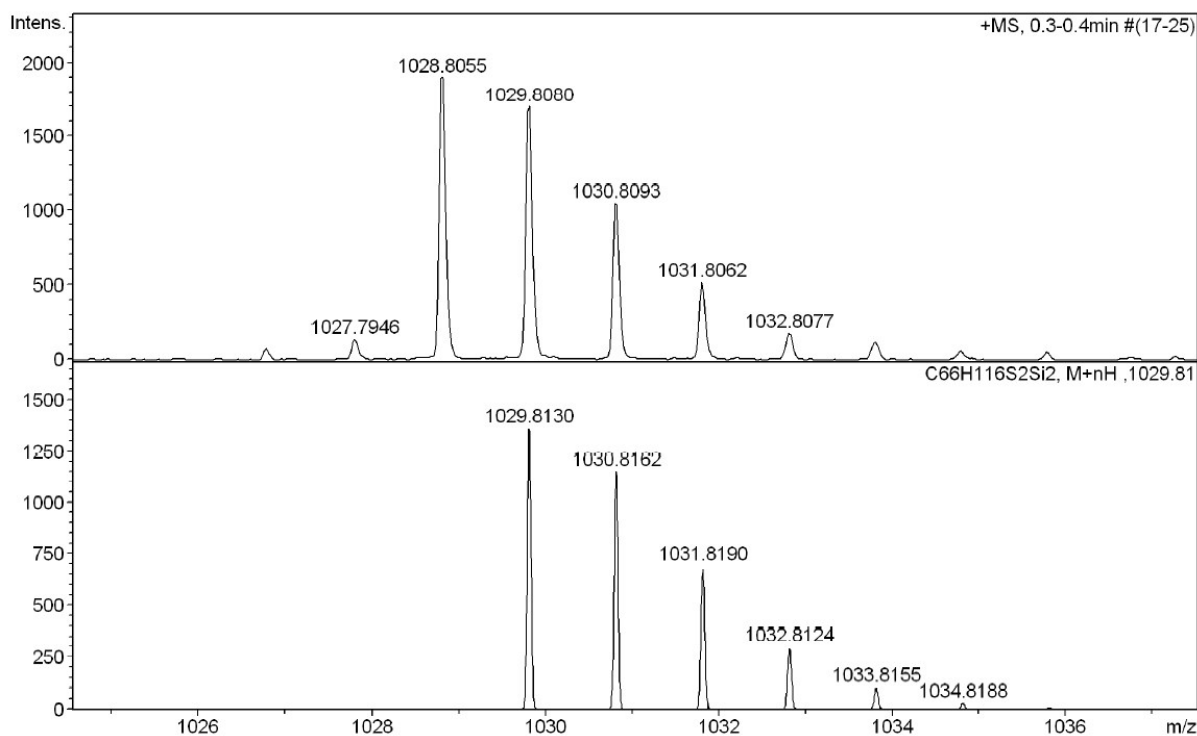

**Fig. S8.** HRMS spectrum of 2,5-bis(tri(9-decenyl)silyl)thieno[3,2-b]thiophene (**C10TTC10**) (APCI, positive). Top: obsd. Bottom: sim.

20190904\_C12SSC12

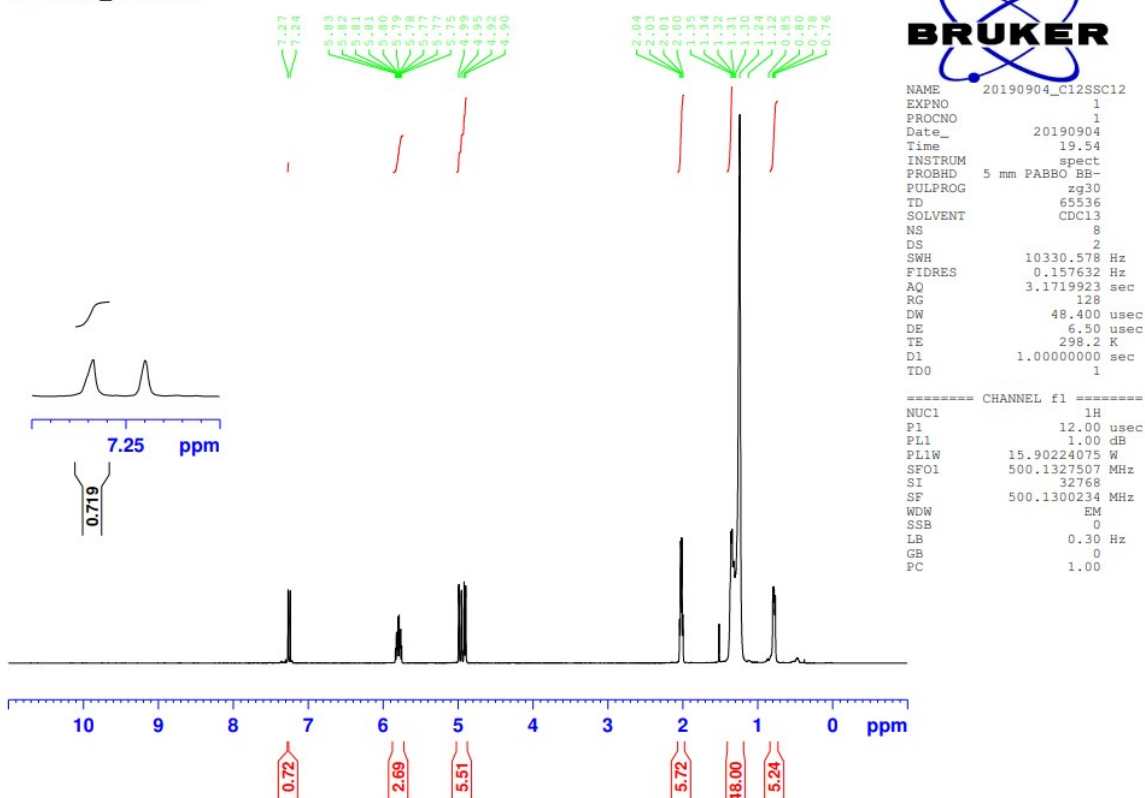

**Fig. S9.**  $^1\text{H}$  NMR spectrum of 2,5-bis(tri(9-decenyl)silyl)thieno[3,2-b]thiophene (C12TTC12) in  $\text{CDCl}_3$ .

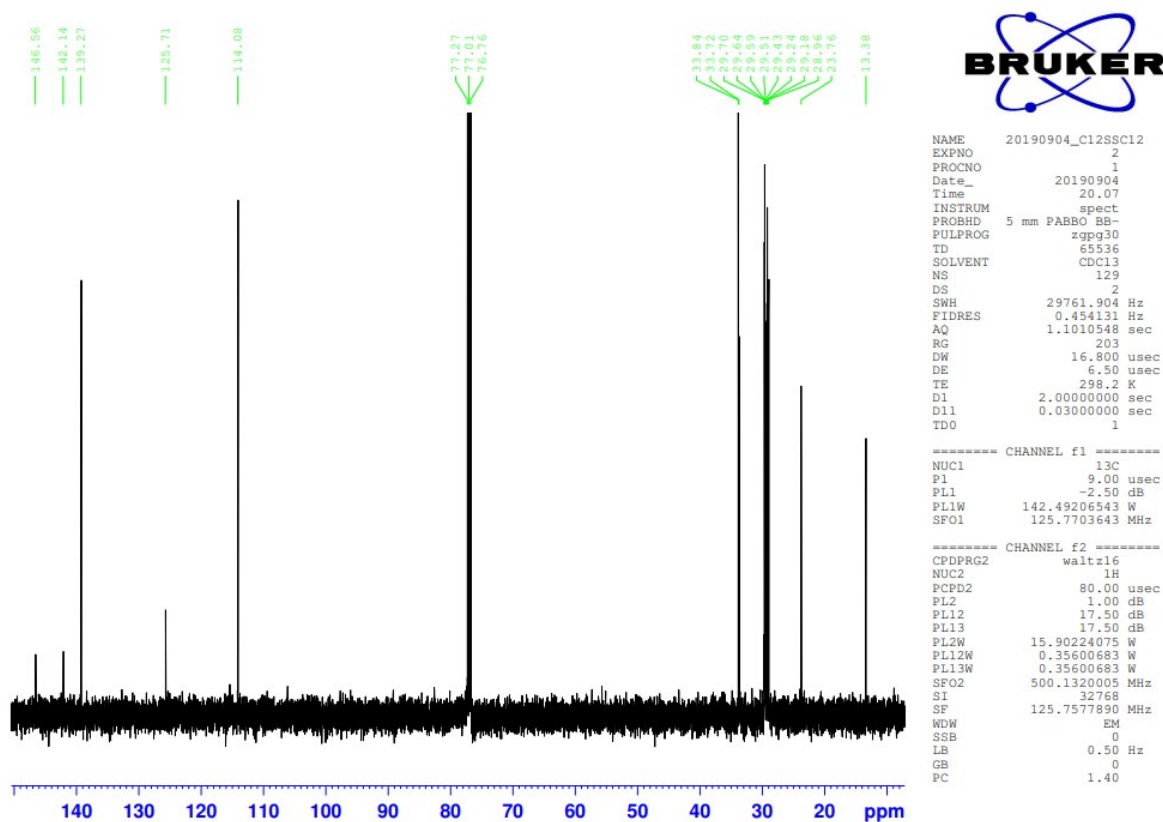

**Fig. S10.**  $^{13}\text{C}$  NMR spectrum of 2,5-bis(tri(9-decenyl)silyl)thieno[3,2-b]thiophene (C12TTC12) in  $\text{CDCl}_3$ .

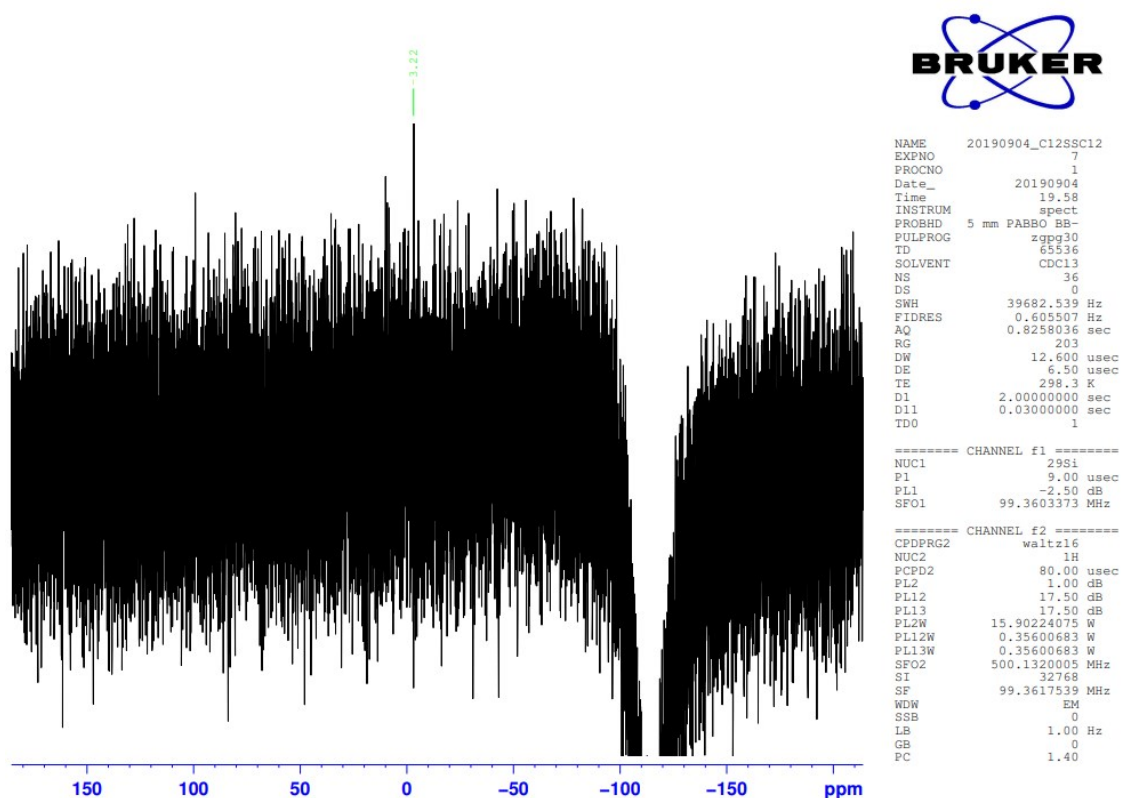

**Fig. S11.**  $^{29}\text{Si}$  NMR spectrum of 2,5-bis(tri(9-decenyl)silyl)thieno[3,2-b]thiophene (C12TTC12) in  $\text{CDCl}_3$ .

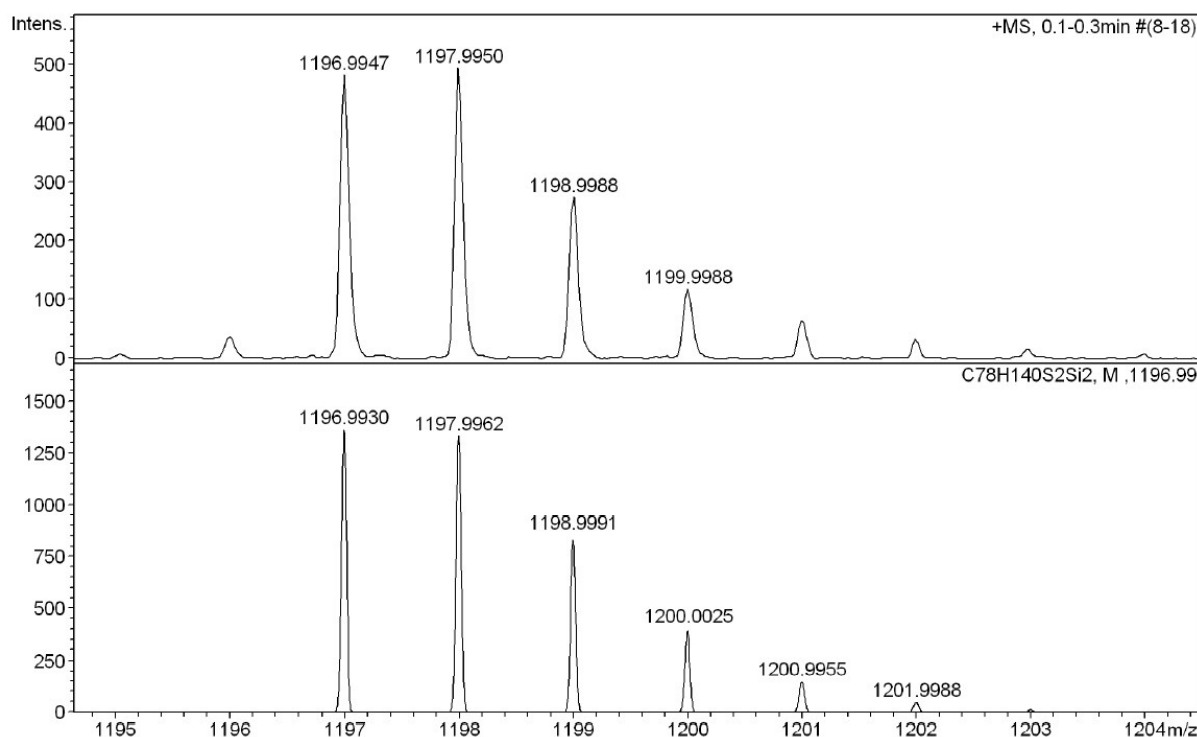

**Fig. S12.** HRMS spectrum of 2,5-bis(tri(9-decenyl)silyl)thieno[3,2-b]thiophene (C12TTC12) (APCI, positive). Top: obsd. Bottom: sim.

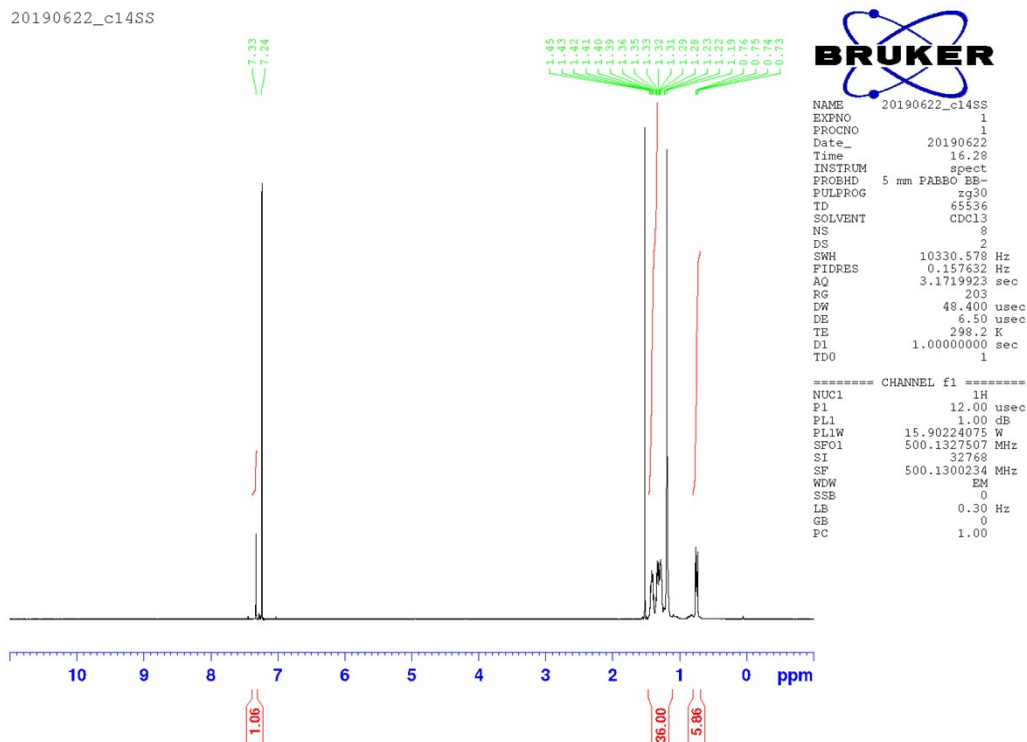

**Fig. S13.**  $^1\text{H}$  NMR spectrum of Molecular Gyrotop (**C14TT**) in  $\text{CDCl}_3$ .

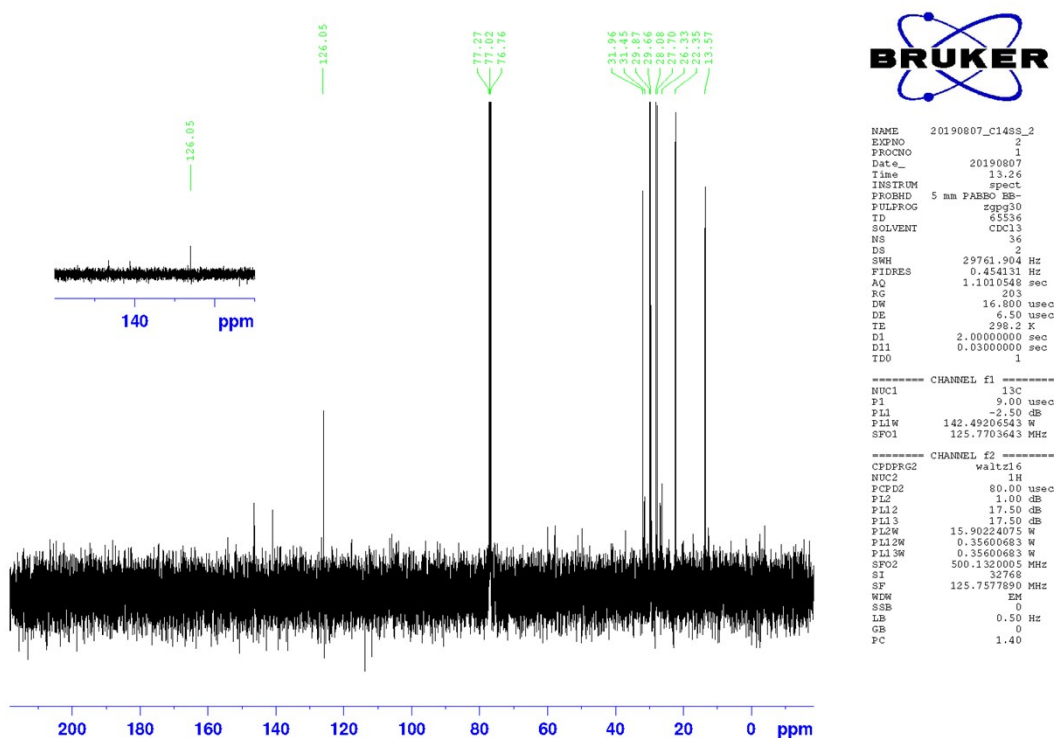

**Fig. S14.**  $^{13}\text{C}$  NMR spectrum of Molecular Gyrotop (**C14TT**) in  $\text{CDCl}_3$ .

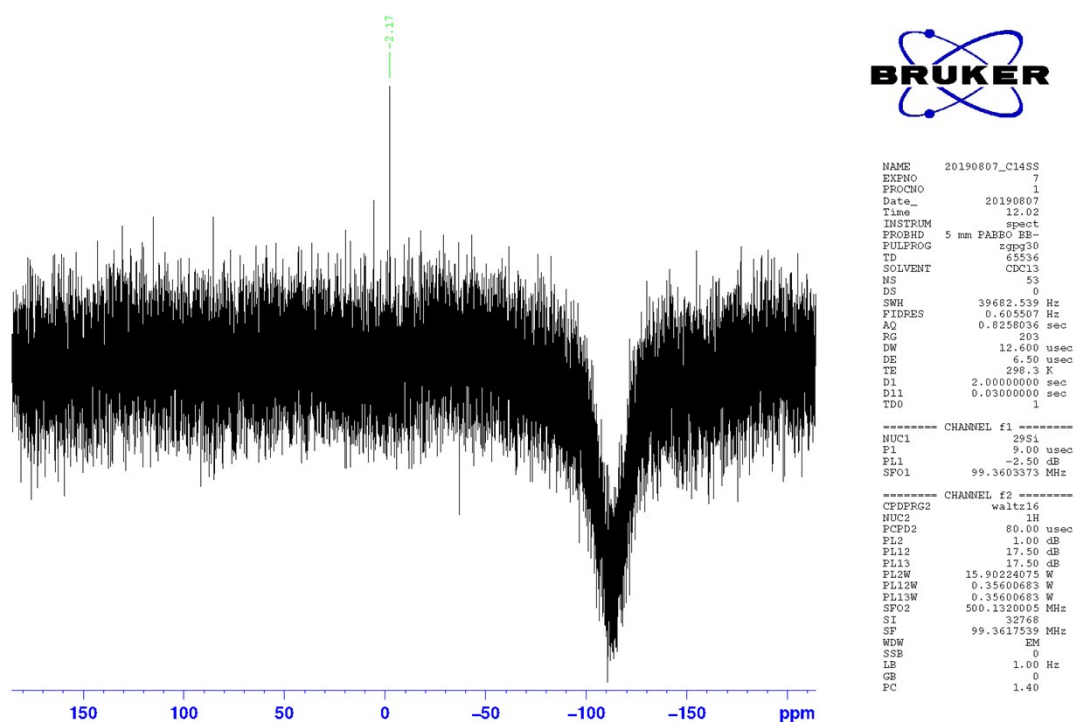

**Fig. S15.**  $^{29}\text{Si}$  NMR spectrum of Molecular Gyrotop (**C14TT**) in  $\text{CDCl}_3$ .

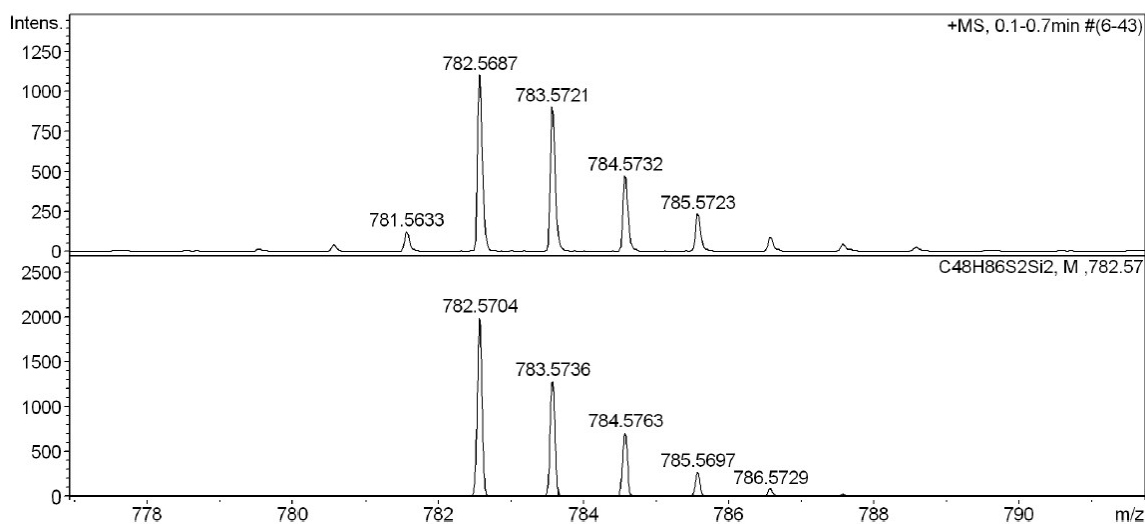

**Fig. S16.** HRMS spectrum of Molecular Gyrotop (**C14TT**) (APCI, positive). Top: obsd. Bottom: sim.

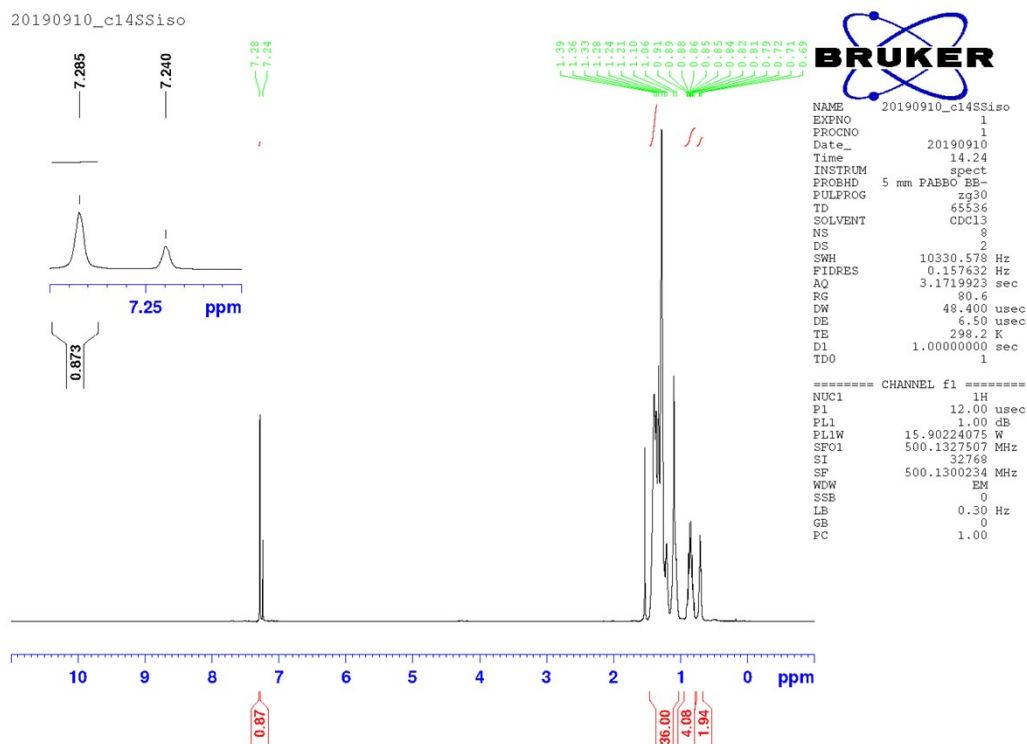

**Fig. S17.**  $^1\text{H}$  NMR spectrum of Molecular Gyrotop Isomer (**C14iTT**) in  $\text{CDCl}_3$ .

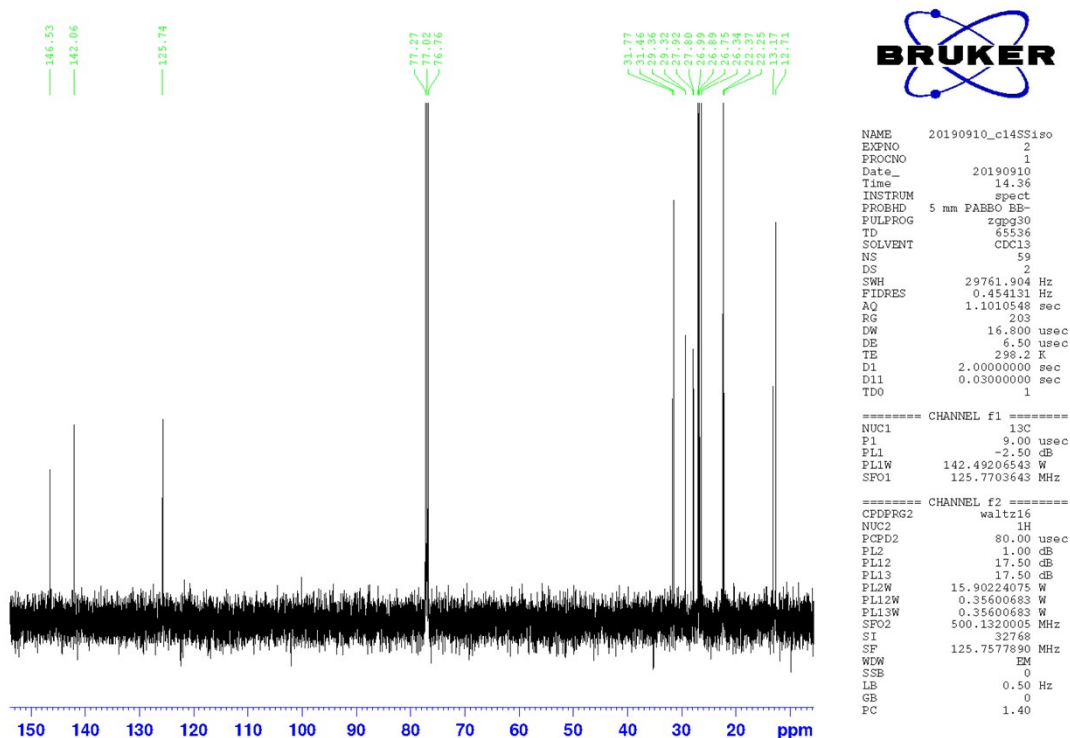

**Fig. S18.**  $^{13}\text{C}$  NMR spectrum of Molecular Gyrotop Isomer (**C14iTT**) in  $\text{CDCl}_3$ .

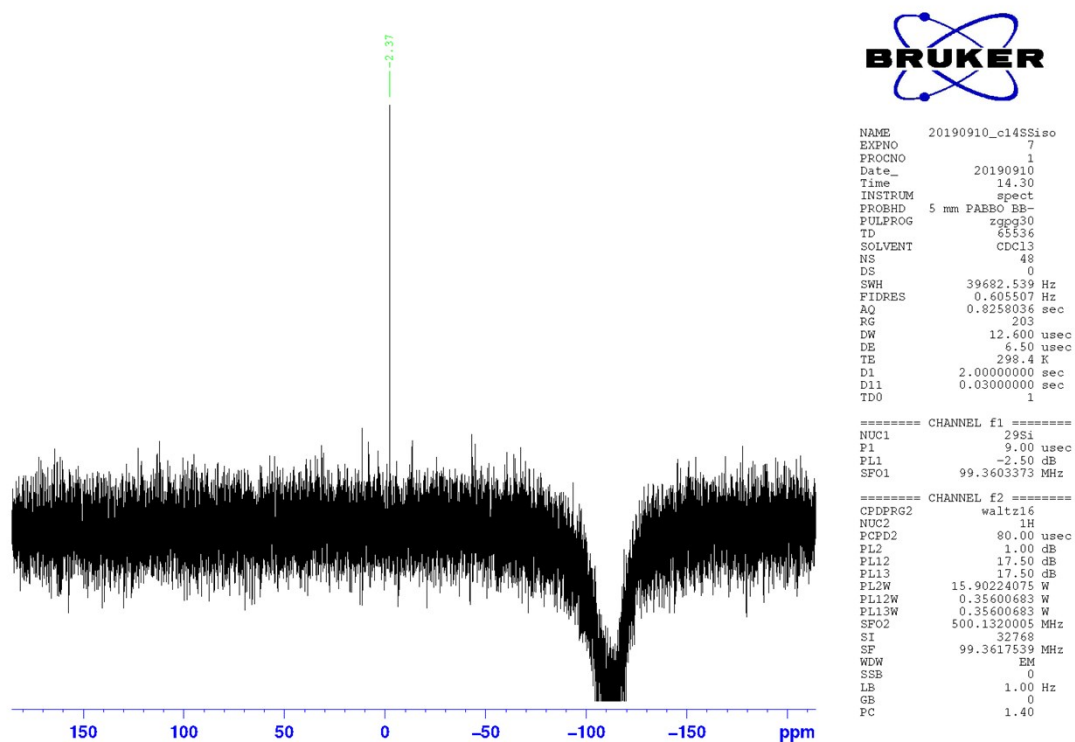

**Fig. S19.**  $^{29}\text{Si}$  NMR spectrum of Molecular Gyrotop Isomer (**C14iTT**) in  $\text{CDCl}_3$ .

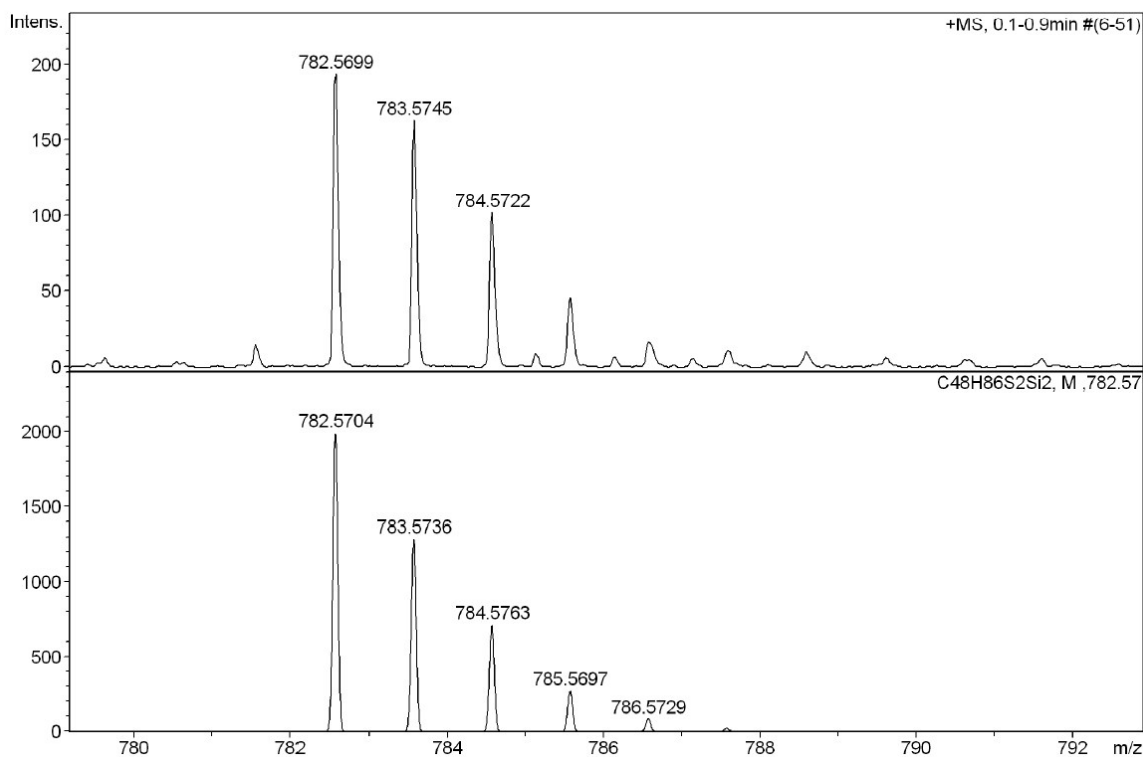

**Fig. S20.** HRMS spectrum of Molecular Gyrotop Isomer (**C14iTT**) (APCI, positive). Top: obsd. Bottom: sim.



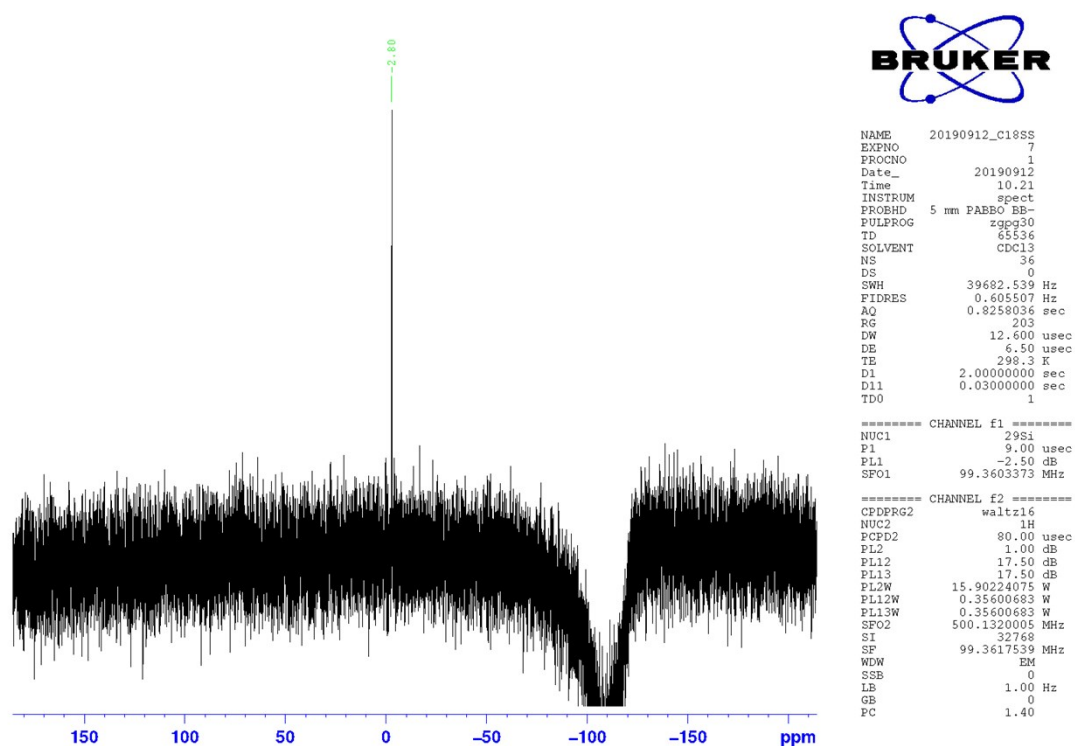

**Fig. S23.**  $^{29}\text{Si}$  NMR spectrum of Molecular Gyrotop (**C18TT**) in  $\text{CDCl}_3$ .

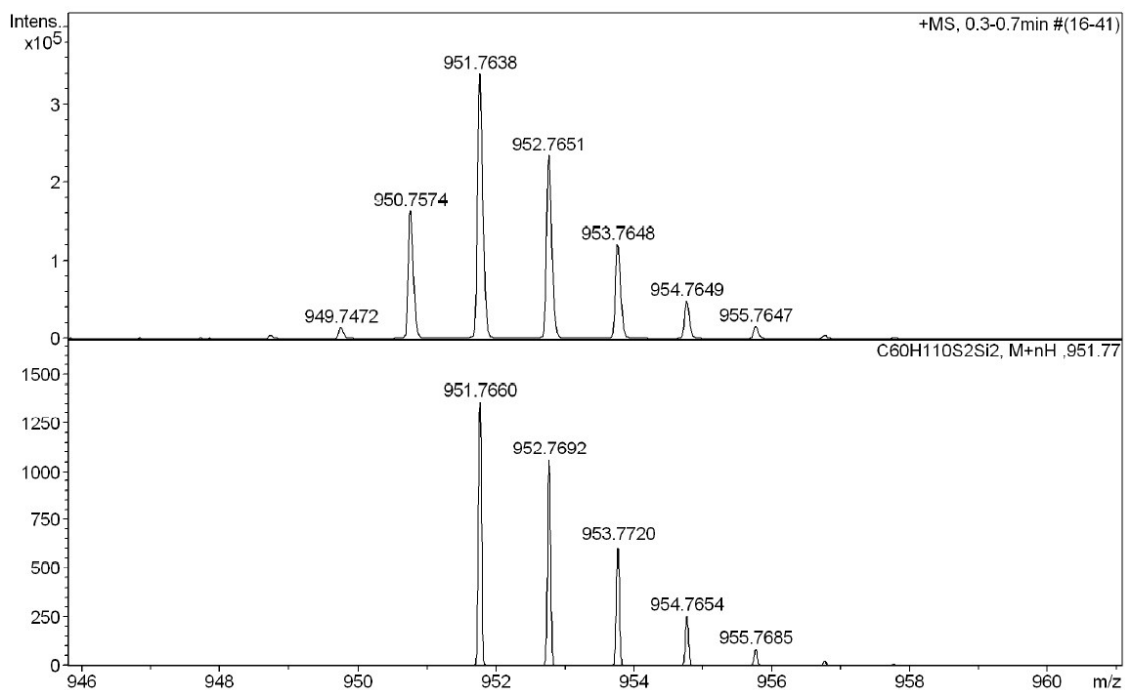

**Fig. S24.** HRMS spectrum of Molecular Gyrotop (**C18TT**) (APCI, positive). Top: obsd. Bottom: sim.

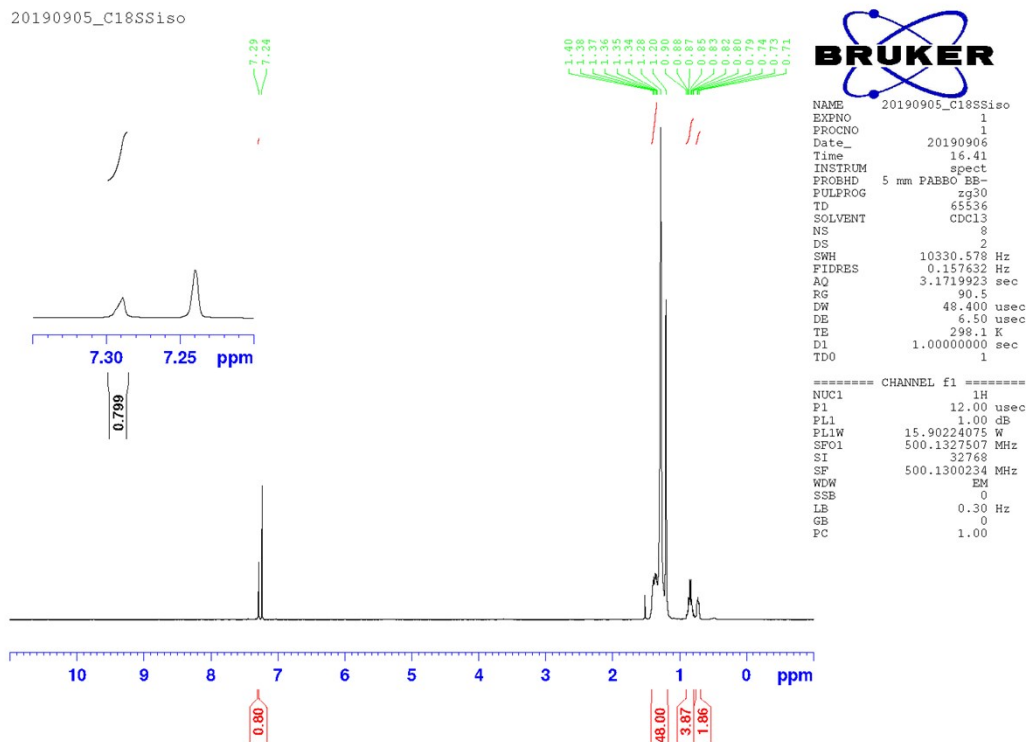

**Fig. S25.**  $^1\text{H}$  NMR spectrum of Molecular Gyrotop Isomer (**C18iTT**) in  $\text{CDCl}_3$ .

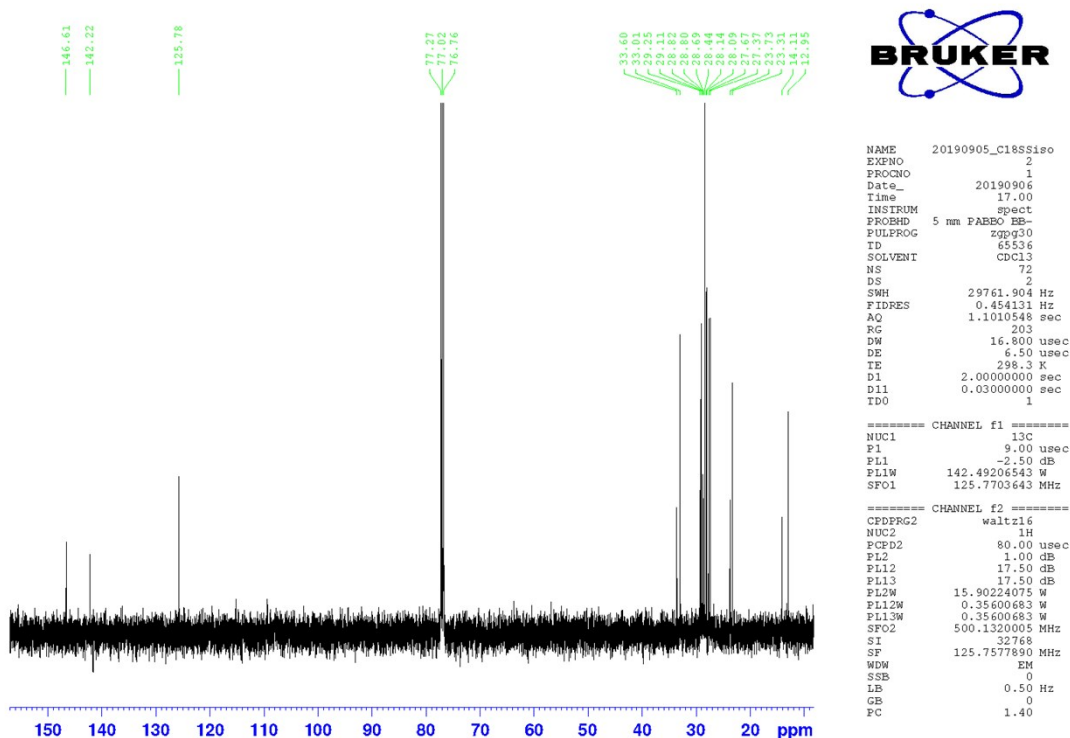

**Fig. S26.**  $^{13}\text{C}$  NMR spectrum of Molecular Gyrotop Isomer (**C18iTT**) in  $\text{CDCl}_3$ .

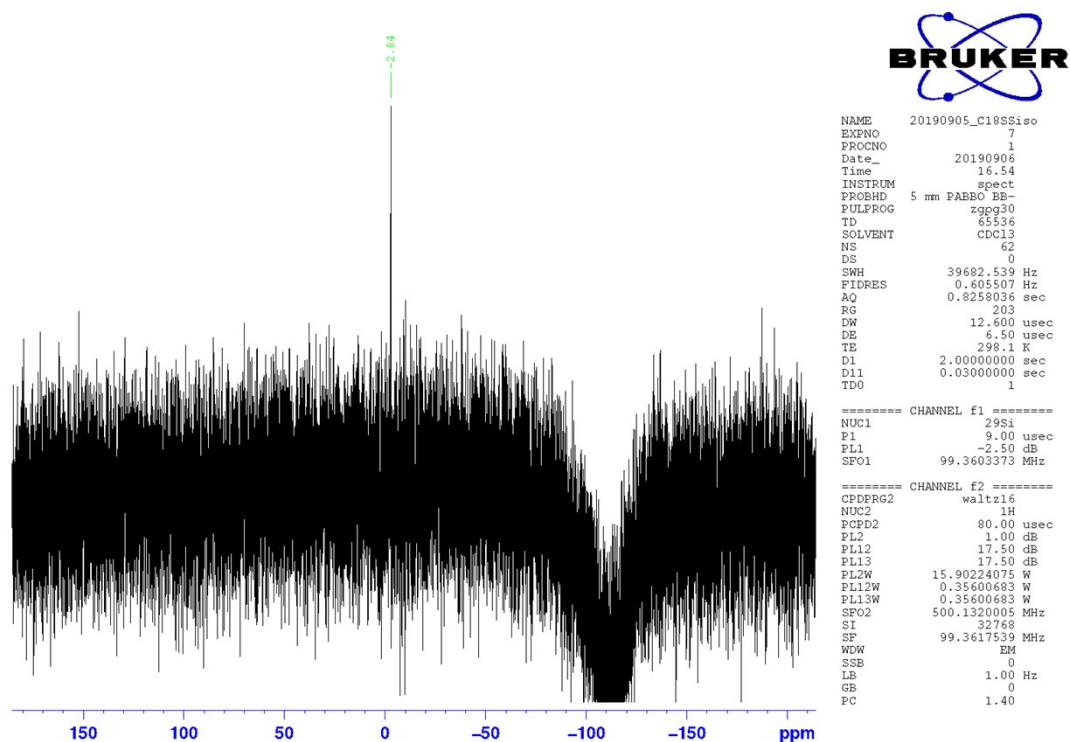

**Fig. S27.**  $^{29}\text{Si}$  NMR spectrum of Molecular Gyrotop Isomer (**C18iTT**) in  $\text{CDCl}_3$ .

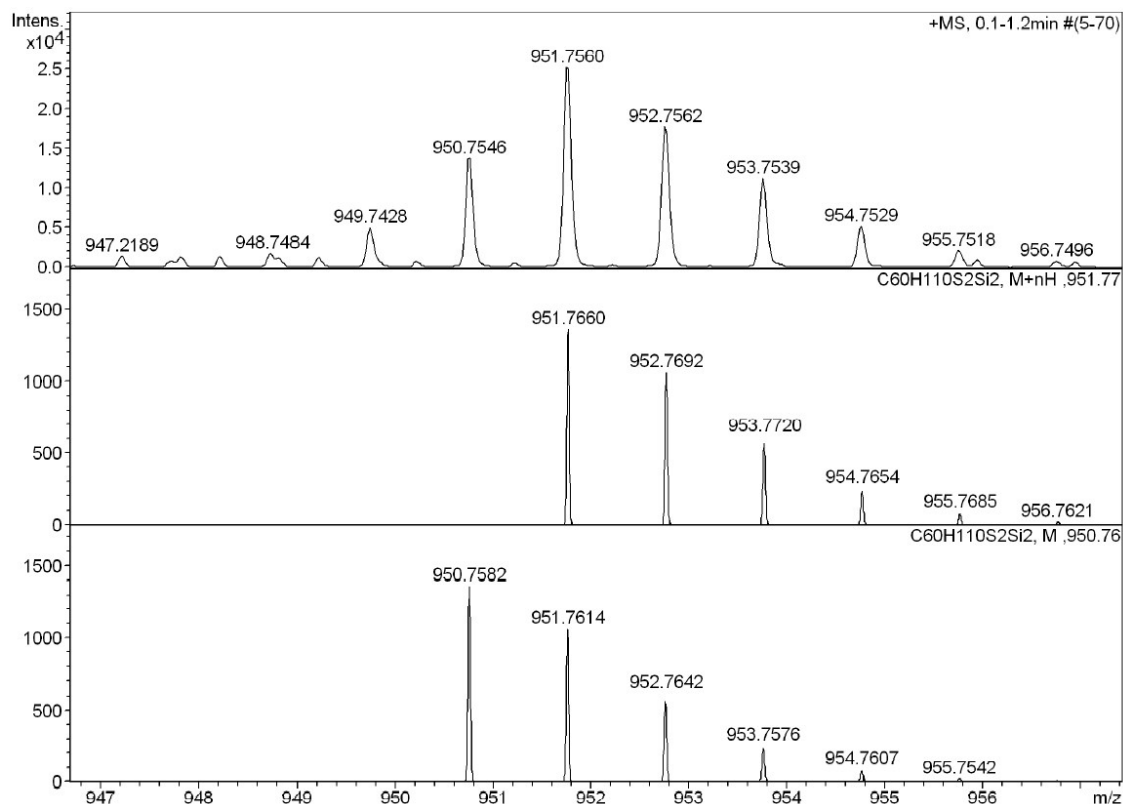

**Fig. S28.** HRMS spectrum of Molecular Gyrotop Isomer (**C18iTT**) (APCI, positive). Top: obsd. Bottom: sim.

20190911\_c22ss

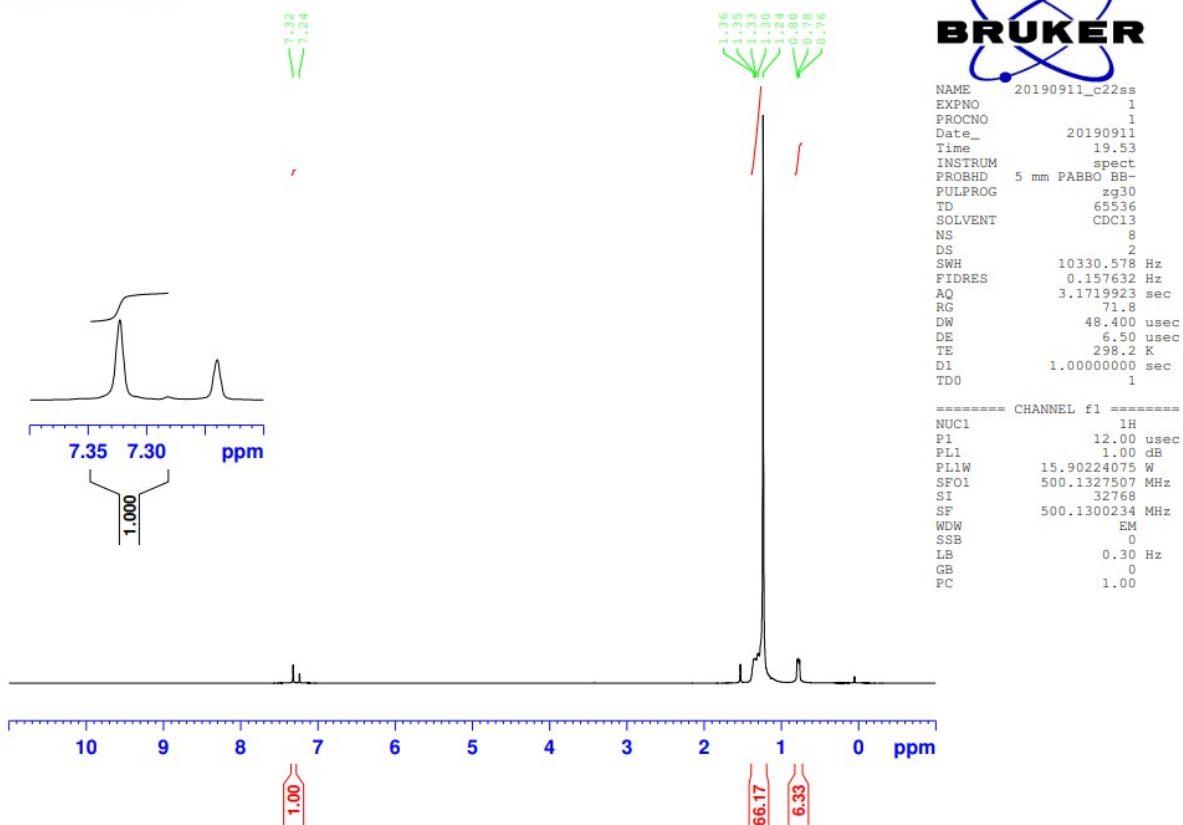

**Fig. S29.**  $^1\text{H}$  NMR spectrum of Molecular Gyrotop (**C22TT**) in  $\text{CDCl}_3$ .

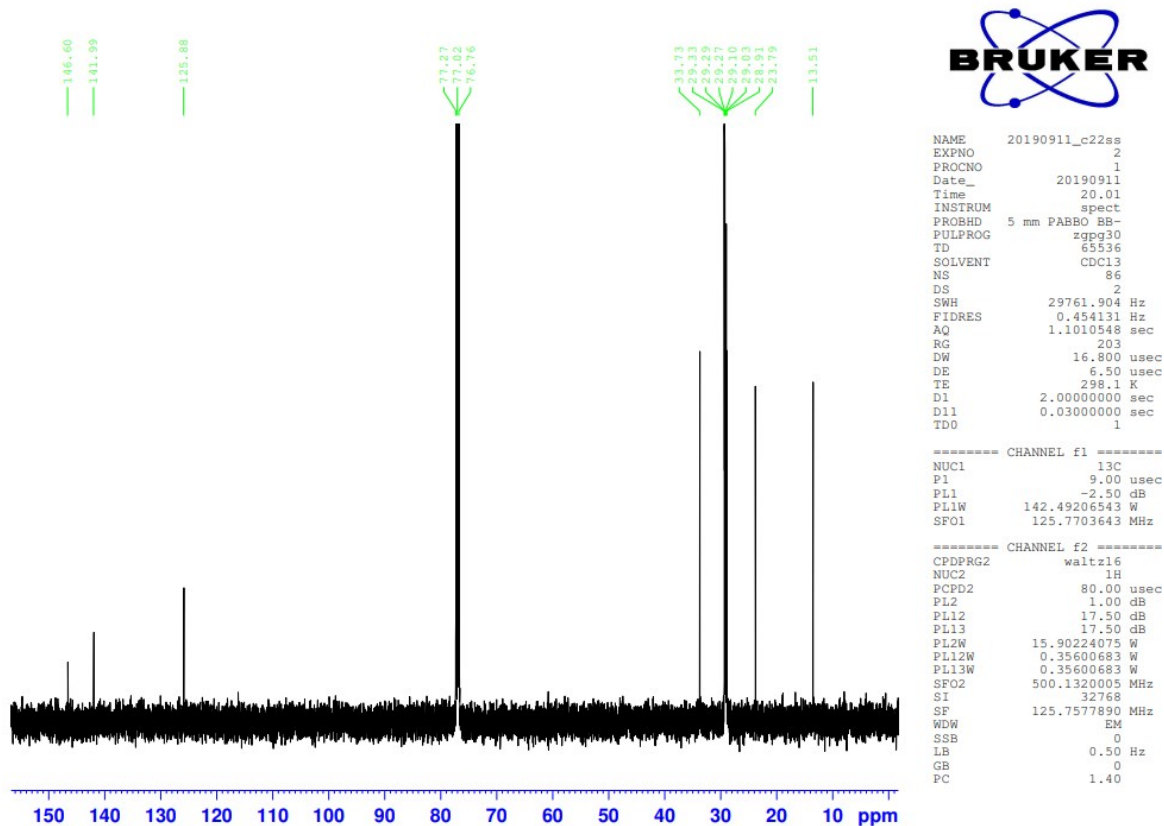

**Fig. S30.**  $^{13}\text{C}$  NMR spectrum of Molecular Gyrotop (**C22TT**) in  $\text{CDCl}_3$ .

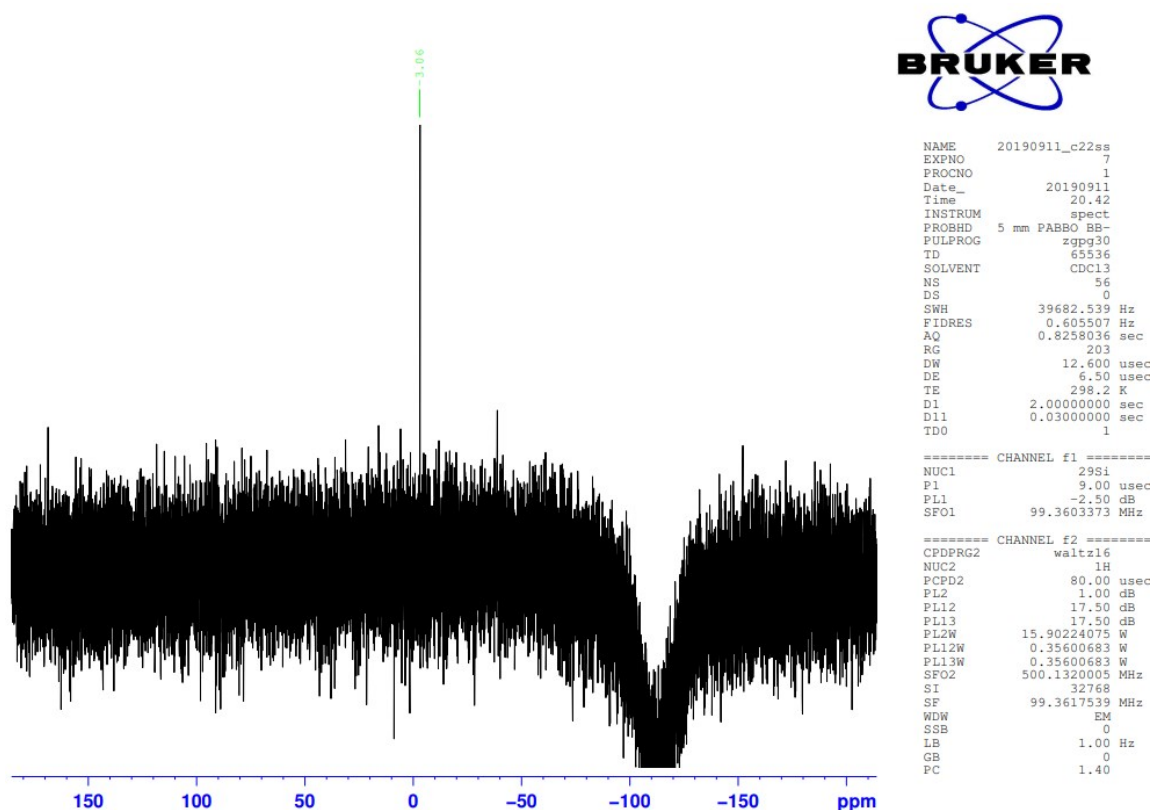

**Fig. S31.**  $^{29}\text{Si}$  NMR spectrum of Molecular Gyrotop (**C22TT**) in  $\text{CDCl}_3$ .

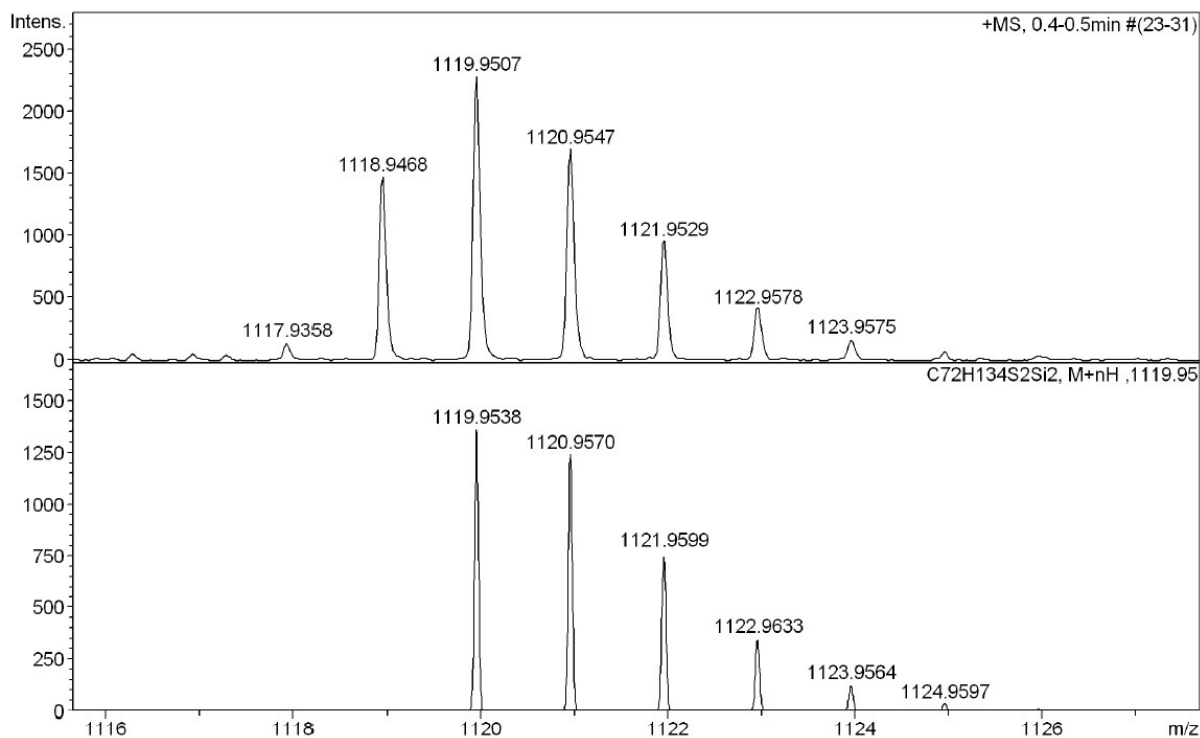

**Fig. S32.** HRMS spectrum of Molecular Gyrotop (**C22TT**) (APCI, positive). Top: obsd. Bottom: sim.

**BRUKER**

NAME 20190911\_c22SSiso  
 EXPNO 1  
 PROCNO 1  
 Date\_ 20190911  
 Time 14.21  
 INSTRUM spect  
 PROBHD 5 mm PABBO BB-  
 PULPROG zg30  
 TD 65536  
 SOLVENT CDCl3  
 NS 8  
 DS 2  
 SWH 10330.578 Hz  
 FIDRES 0.157632 Hz  
 AQ 3.1719923 sec  
 RG 144  
 DW 48.400 usec  
 DE 6.50 usec  
 TE 298.1 K  
 D1 1.00000000 sec  
 TD0 1

===== CHANNEL f1 =====  
 NUC1 1H  
 P1 12.00 usec  
 PL1 1.00 dB  
 PL1W 15.90224075 W  
 SFO1 500.1327507 MHz  
 SI 32768  
 SF 500.1300234 MHz  
 WDW EM  
 SSB 0  
 LB 0.30 Hz  
 GB 0  
 PC 1.00

7.25 ppm  
 1.00  
 55.68  
 4.27  
 2.11  
 ppm

**BRUKER**

NAME 20190911\_c225Siso  
 EXPNO 2  
 PROCNO 1  
 Date\_ 20190911  
 Time 14.34  
 INSTRUM spect  
 PROBHD 5 mm PABBO BB-  
 PULPROG zgpg30  
 TD 65536  
 SOLVENT CDCl3  
 NS 116  
 DS 2  
 SWH 29761.904 Hz  
 FIDRES 0.454131 Hz  
 AQ 1.1010548 sec  
 RG 203  
 DW 16.800 usec  
 DE 6.50 usec  
 TE 298.1 K  
 D1 2.00000000 sec  
 D11 0.03000000 sec  
 TD0 1

----- CHANNEL f1 -----  
 NUC1 13C  
 P1 9.00 usec  
 PL1 -2.50 dB  
 PL1W 142.49206543 W  
 SFO1 125.7703643 MHz

----- CHANNEL f2 -----  
 CPDPRG2 waltz16  
 NUC2 1H  
 PCPD2 80.00 usec  
 PL2 1.00 dB  
 PL12 17.50 dB  
 PL13 17.50 dB  
 PL2W 15.90224075 W  
 PL12W 0.35600683 W  
 PL13W 0.35600683 W  
 SFO2 500.1320005 MHz  
 SI 32768  
 SF 125.7577890 MHz  
 WDW EM  
 SSB 0  
 LB 0.50 Hz  
 GB 0  
 PC 1.40

S21

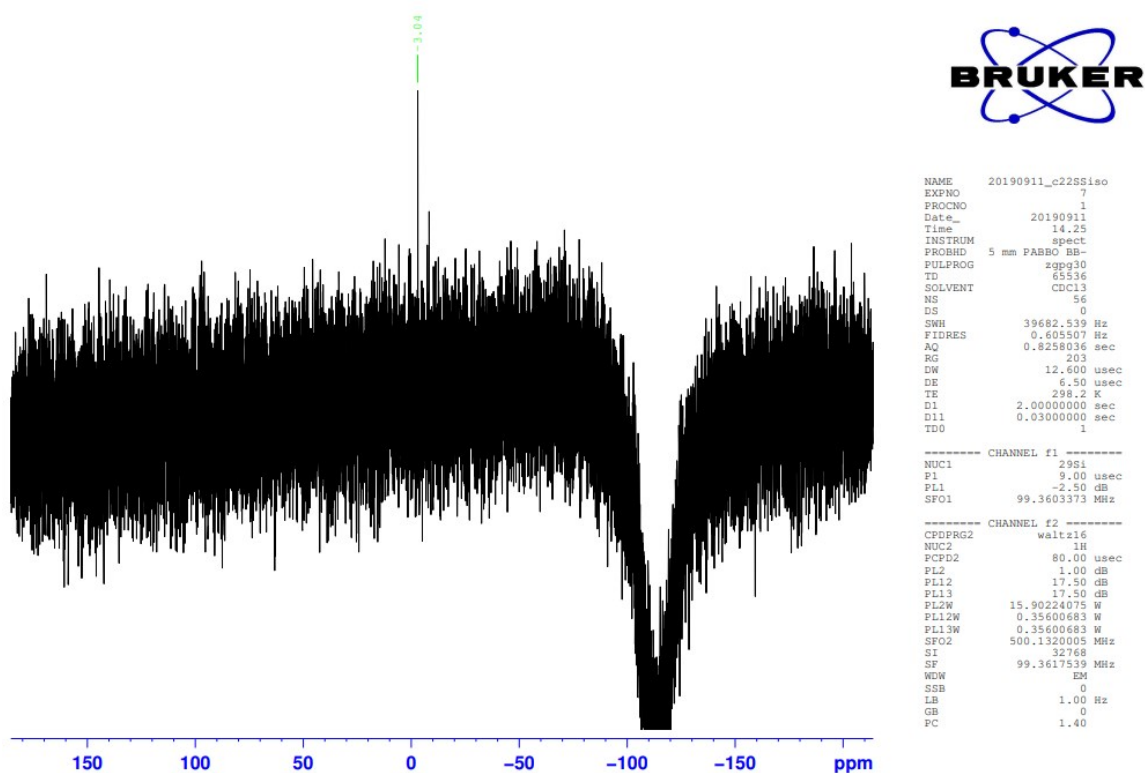

**Fig. S35.**  $^{29}\text{Si}$  NMR spectrum of Molecular Gyrotop Isomer (**C22iTT**) in  $\text{CDCl}_3$ .

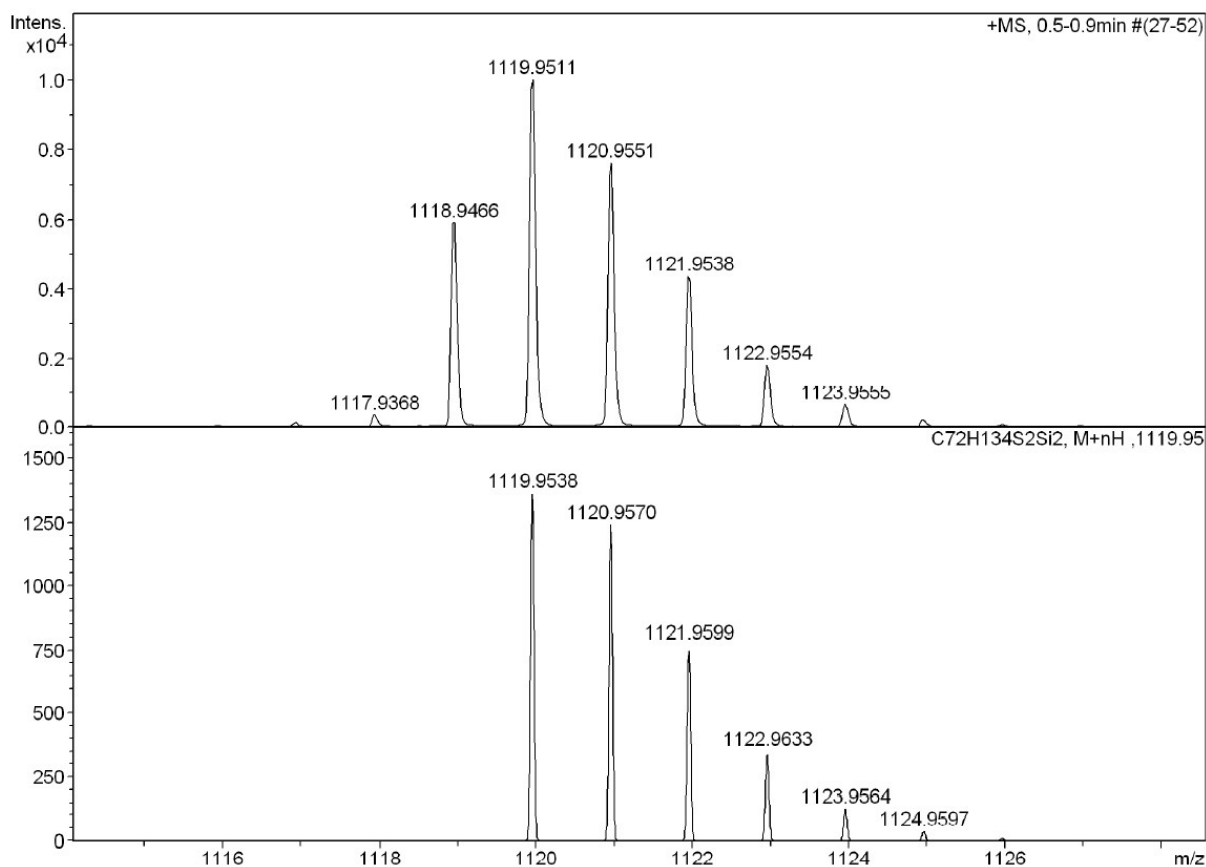

**Fig. S36.** HRMS spectrum of Molecular Gyrotop Isomer (**C22iTT**) (APCI, positive). Top: obsd. Bottom: sim.

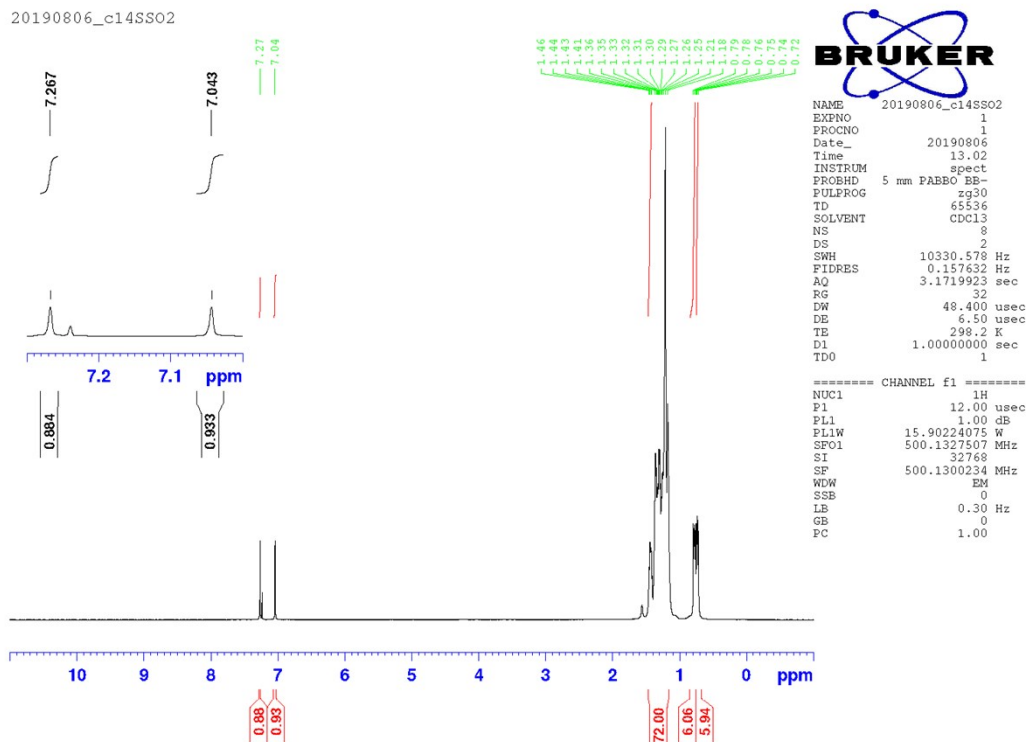

Fig. S37.  $^1\text{H}$  NMR spectrum of Molecular Gyrotop (**C14TTO2**) in  $\text{CDCl}_3$ .

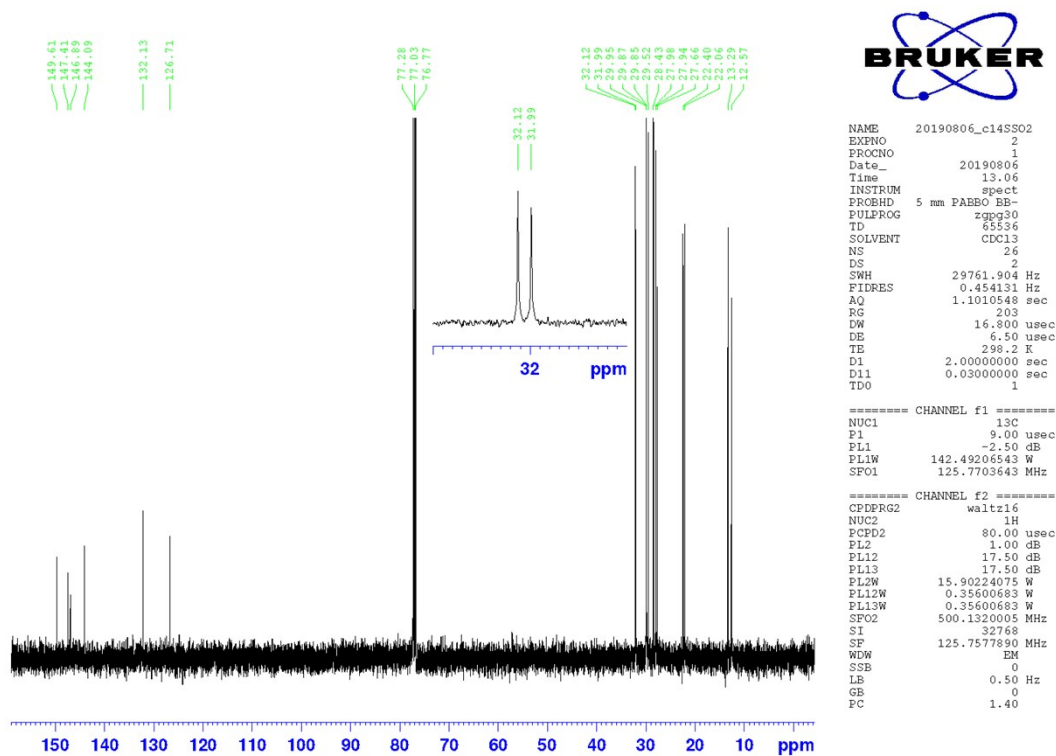

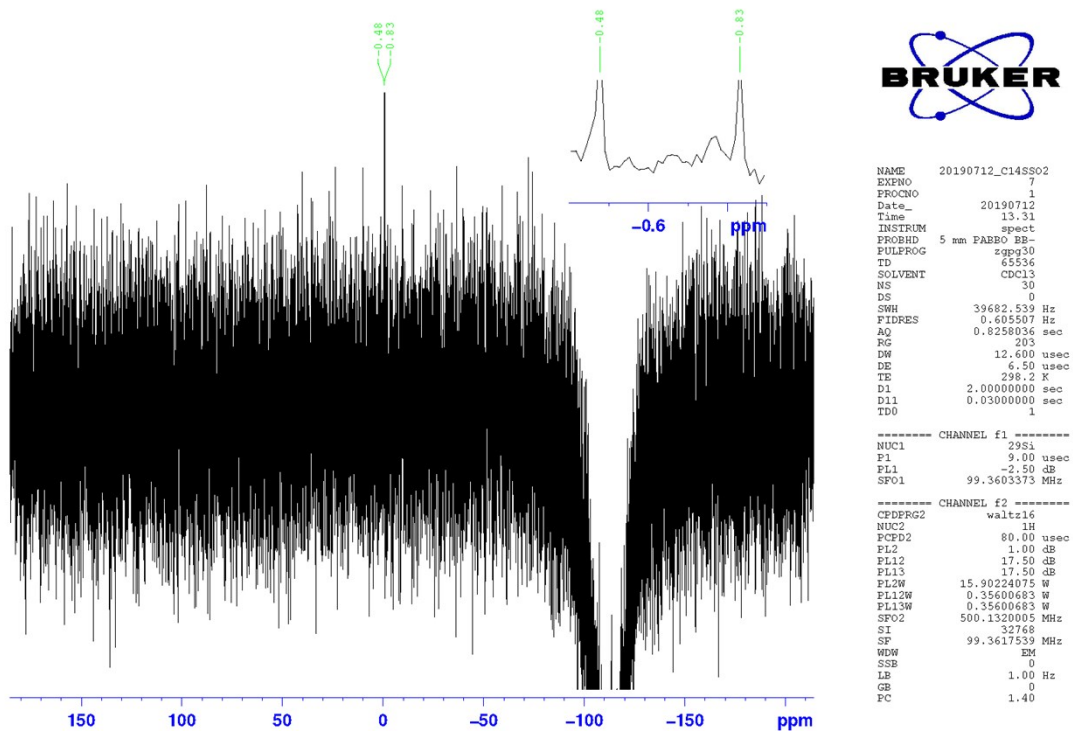

**Fig. S39.**  $^{29}\text{Si}$  NMR spectrum of Molecular Gyrotop (**C14TTO2**) in  $\text{CDCl}_3$ .

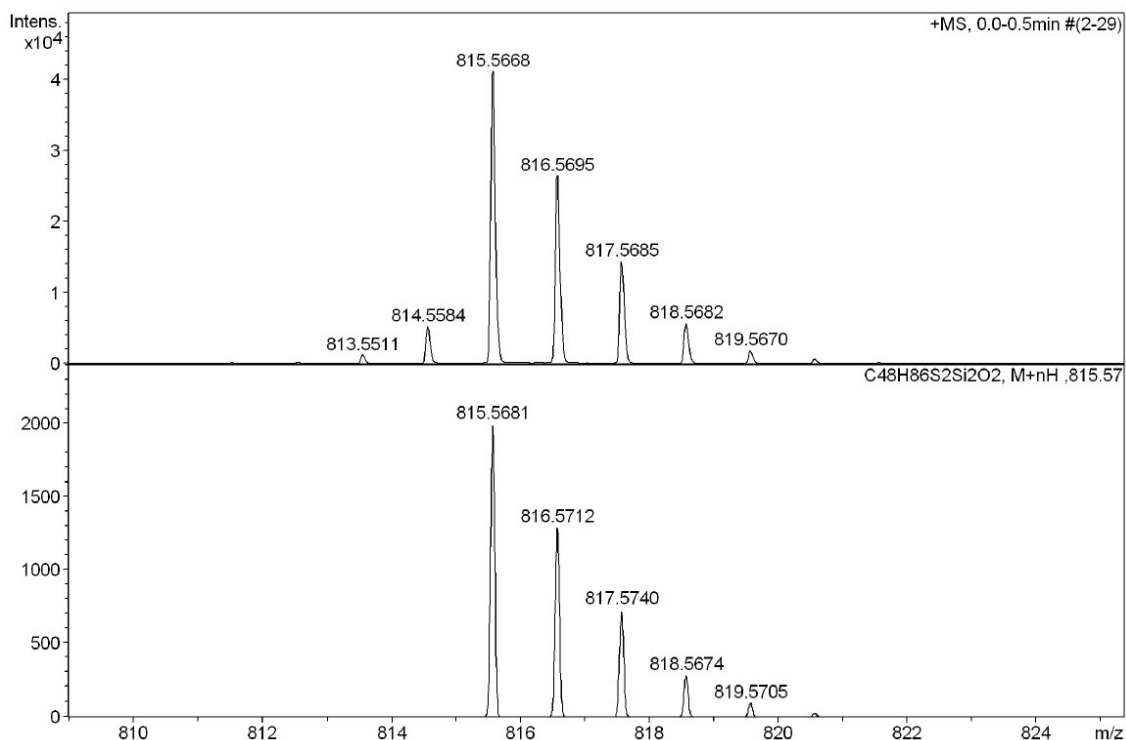

**Fig. S40.** HRMS spectrum of Molecular Gyrotop (**C14TTO2**) (APCI, positive). Top: obsd. Bottom: sim.



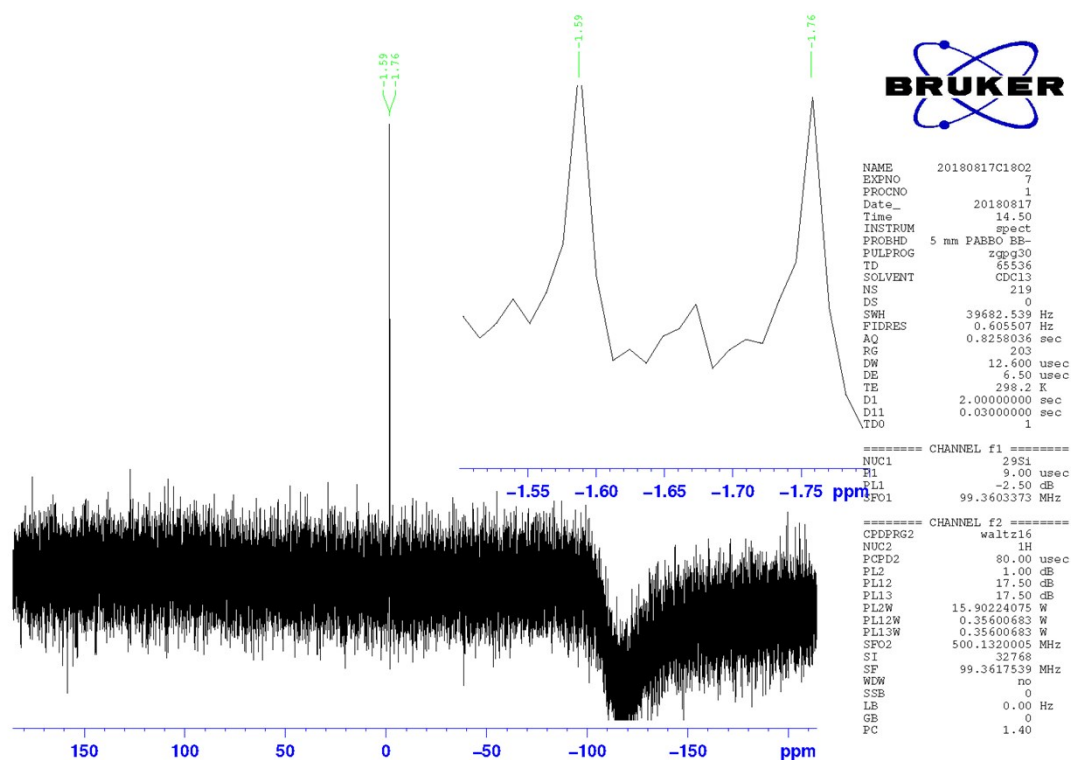

**Fig. S43.**  $^{29}\text{Si}$  NMR spectrum of Molecular Gyrotop (**C18TTO2**) in  $\text{CD}_2\text{Cl}_2$ .

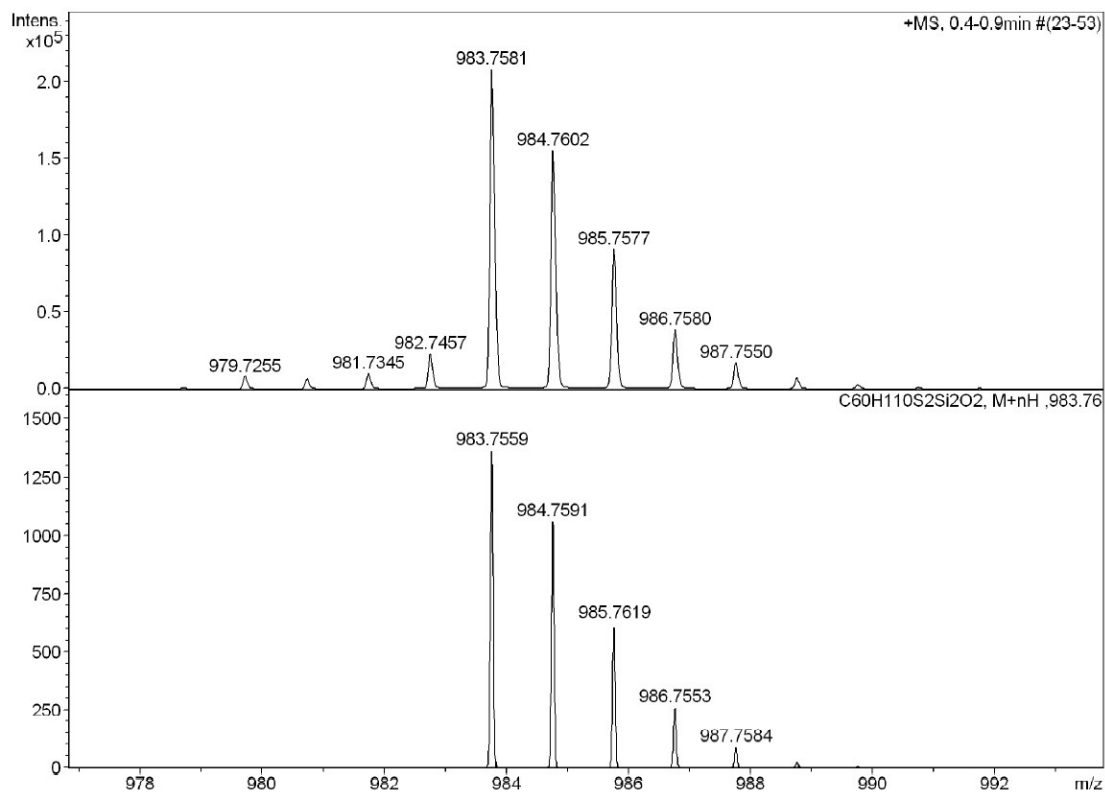

**Fig. S44.** HRMS spectrum of Molecular Gyrotop (**C18TTO2**) (APCI, positive). Top: obsd. Bottom: sim.

**BRUKER**

NAME 20190830\_C22SSO2  
 EXPNO 1  
 PROCNO 1  
 Date\_ 20190830  
 Time 17.09  
 INSTRUM spect  
 PROBHD 5 mm PABBO BB-  
 PULPROG zg30  
 TD 65536  
 SOLVENT CDC13  
 NS 8  
 DS 2  
 SWH 10330.578 Hz  
 FIDRES 0.157632 Hz  
 AQ 3.1719923 sec  
 RG 57  
 DW 48.400 usec  
 DE 6.50 usec  
 TE 298.2 K  
 D1 1.00000000 sec  
 TD0 1

===== CHANNEL f1 =====  
 NUC1 1H  
 P1 12.00 usec  
 PL1 1.00 dB  
 PL1W 15.90224075 W  
 SFO1 500.1327507 MHz  
 SI 32768  
 SF 500.1300234 MHz  
 WDW EM  
 SSB 0  
 LB 0.30 Hz  
 GB 0  
 PC 1.00

7.28  
7.24  
7.05

1.38  
1.35  
1.32  
1.29  
1.24  
0.86  
0.83  
0.83  
0.81  
0.76  
0.74

7.2 ppm  
0.710  
0.757

20.00  
5.69  
5.01

7.07  
7.06

ppm

**13C NMR Spectrum Data:**

| Chemical Shift (ppm)           | Assignment                   |
|--------------------------------|------------------------------|
| 149.34, 148.16, 147.20, 143.77 | Aromatic / Carbonyl          |
| 132.40, 126.16                 | Aromatic / Carbonyl          |
| 77.27, 77.02, 76.77            | Solvent (CDCl <sub>3</sub> ) |
| 33.67, 33.59, 33.59            | Aliphatic                    |
| 33.42, 32.67                   | Aliphatic                    |

**Acquisition Parameters:**

|         |                   |
|---------|-------------------|
| NAME    | 20190830_C22S02   |
| EXPNO   | 2                 |
| PROCNO  | 1                 |
| Date_   | 20190830          |
| Time    | 17.19             |
| INSTRUM | spect             |
| PROBHD  | 5 mm PABBO BB-    |
| PULPROG | zgpg30            |
| TD      | 65536             |
| SOLVENT | CDCl <sub>3</sub> |
| NS      | 151               |
| DS      | 2                 |
| SWH     | 29761.904 Hz      |
| FIDRES  | 0.454131 Hz       |
| AQ      | 1.1010548 sec     |
| RG      | 203               |
| DW      | 16.800 usec       |
| DE      | 6.50 usec         |
| TE      | 298.2 K           |
| D1      | 2.00000000 sec    |
| D11     | 0.03000000 sec    |
| TD0     | 1                 |

**Channel f1 Parameters:**

|      |                 |
|------|-----------------|
| NUC1 | 13C             |
| P1   | 9.00 usec       |
| PL1  | -2.50 dB        |
| PL1W | 142.49206543 W  |
| SFO1 | 125.7703643 MHz |

**Channel f2 Parameters:**

|         |                 |
|---------|-----------------|
| CPDPRG2 | waltz16         |
| NUC2    | 1H              |
| PCPD2   | 80.00 usec      |
| PL2     | 1.00 dB         |
| PL12    | 17.50 dB        |
| PL13    | 17.50 dB        |
| PL2W    | 15.90224075 W   |
| PL12W   | 0.35600683 W    |
| PL13W   | 0.35600683 W    |
| SFO2    | 500.1320005 MHz |
| SI      | 32768           |
| SF      | 125.7577890 MHz |
| WDW     | EM              |
| SSB     | 0               |
| LB      | 0.50 Hz         |
| GB      | 0               |
| PC      | 1.40            |

S27

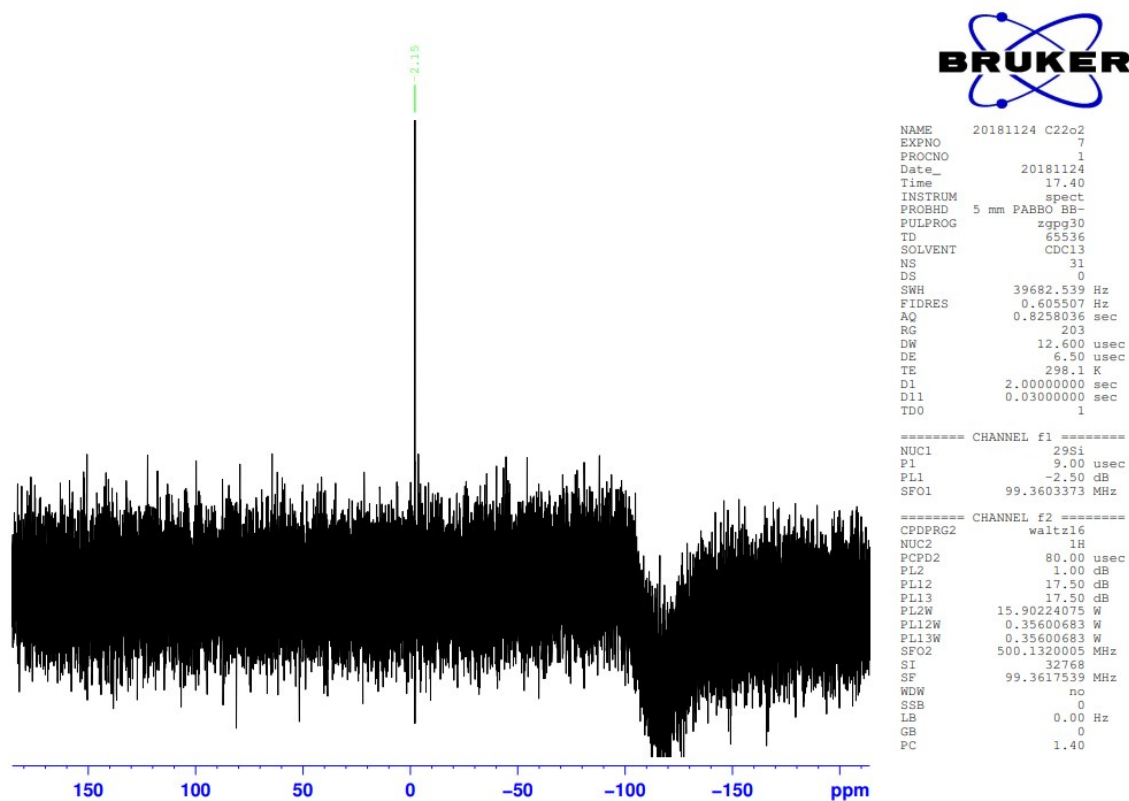

**Fig. S47.**  $^{29}\text{Si}$  NMR spectrum of Molecular Gyrotop (**C22TTO2**) in  $\text{CDCl}_3$ .

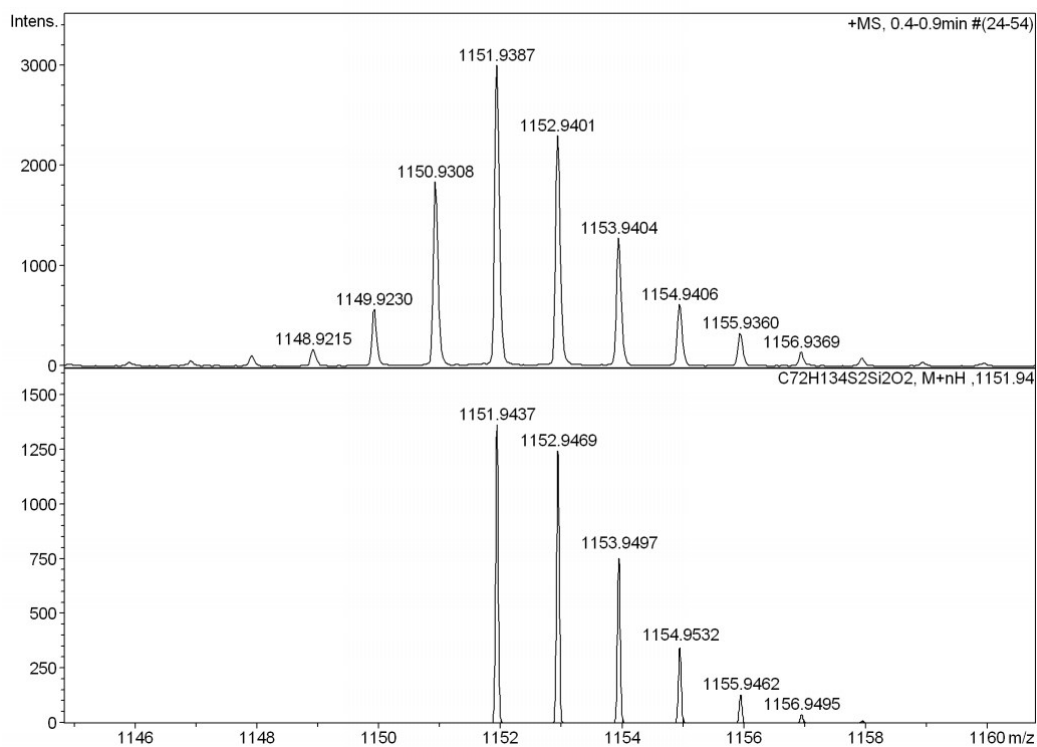

**Fig. S48.** HRMS spectrum of Molecular Gyrotop (**C22TTO2**) (APCI, positive). Top: obsd. Bottom: sim.

20190909\_TMSSS

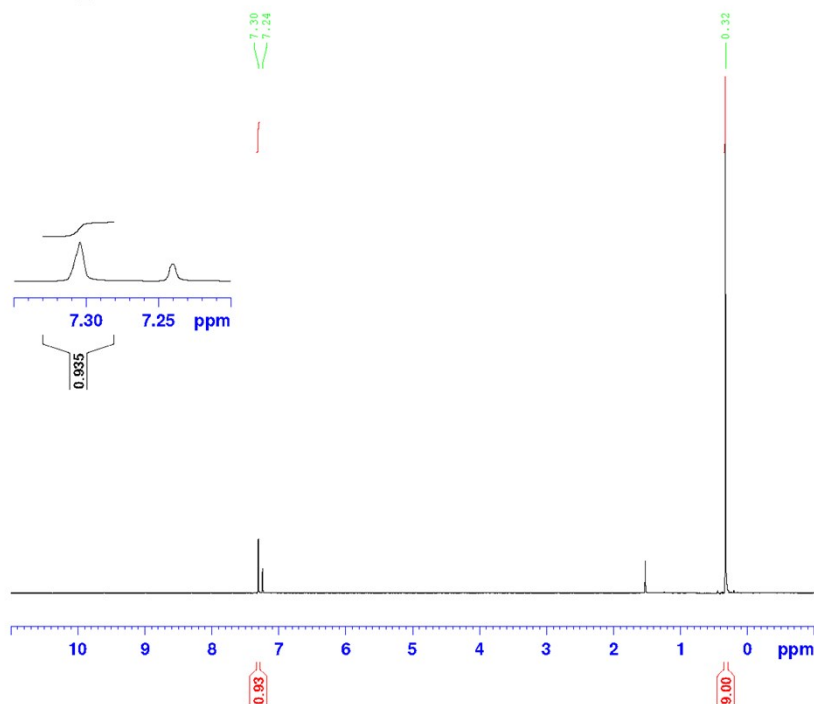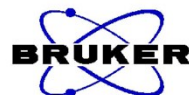

```

NAME      20190909_TMSSS
EXPNO     1
PROCNO    1
Date_     20190909
Time      13.41
INSTRUM   spect
PROBHD    5 mm PABBO BB-
PULPROG   zg30
TD         65536
SOLVENT   CDCl3
NS         2
DS         2
SWH        10310.578 Hz
FIDRES     0.157632 Hz
AQ         3.1719923 sec
RG         203
DW         48.400 usec
DE         6.50 usec
TE         298.2 K
D1         1.00000000 sec
TD0        1
===== CHANNEL f1 =====
NUC1       1H
P1         12.00 usec
PL1        1.00 dB
PL1W       15.90224075 W
SFO1       500.1327507 MHz
SI         32768
SF         500.1300234 MHz
WDW        EM
SSB        0
LB         0.30 Hz
GB         0
PC         1.00

```

**Fig. S49.** <sup>1</sup>H NMR spectrum of 2,5-bis(trimethylsilyl)thieno[3,2-b]thiophene (TMSTT) in CDCl<sub>3</sub>.

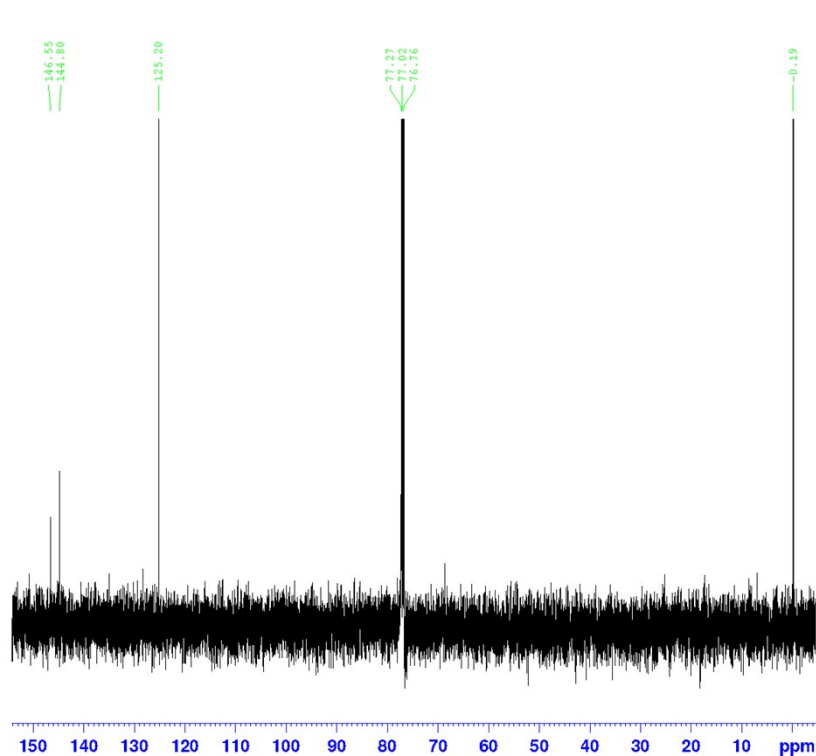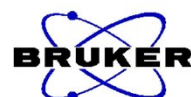

```

NAME      20190909_TMSSS
EXPNO     2
PROCNO    1
Date_     20190909
Time      13.51
INSTRUM   spect
PROBHD    5 mm PABBO BB-
PULPROG   zgpg30
TD         65536
SOLVENT   CDCl3
NS         82
DS         2
SWH        29761.904 Hz
FIDRES     0.454131 Hz
AQ         1.1010548 sec
RG         203
DW         16.800 usec
DE         6.50 usec
TE         298.2 K
D1         2.00000000 sec
D11        0.03000000 sec
TD0        1
===== CHANNEL f1 =====
NUC1       13C
P1         9.00 usec
PL1        -2.50 dB
PL1W       142.49206543 W
SFO1       125.7703643 MHz
===== CHANNEL f2 =====
CPDPRG2   waltz16
NUC2       1H
PCPD2      80.00 usec
PL2        1.00 dB
PL12       17.50 dB
PL13       17.50 dB
PL2W       15.90224075 W
PL12W      0.35600683 W
PL13W      0.35600683 W
SFO2       500.1320005 MHz
SI         32768
SF         125.7577890 MHz
WDW        EM
SSB        0
LB         0.50 Hz
GB         0
PC         1.40

```

**Fig. S50.** <sup>13</sup>C NMR spectrum of 2,5-bis(trimethylsilyl)thieno[3,2-b]thiophene (TMSTT) in CDCl<sub>3</sub>.

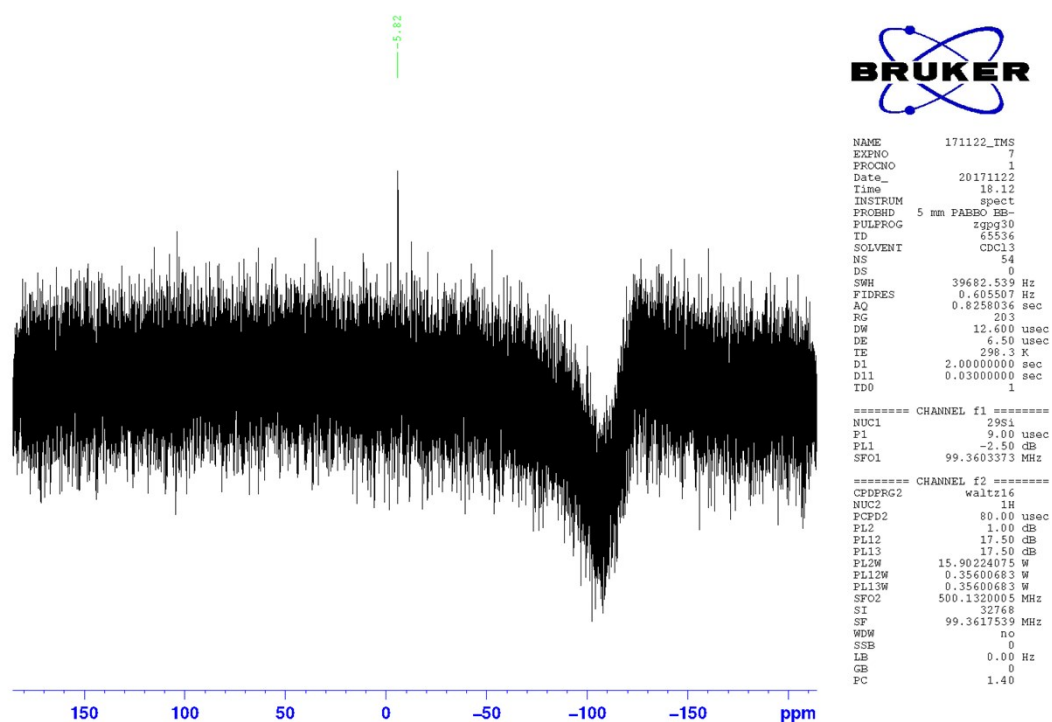

**Fig. S51.**  $^{29}\text{Si}$  NMR spectrum of 2,5-bis(trimethylsilyl)thieno[3,2-b]thiophene (TMSTT) in  $\text{CDCl}_3$ .

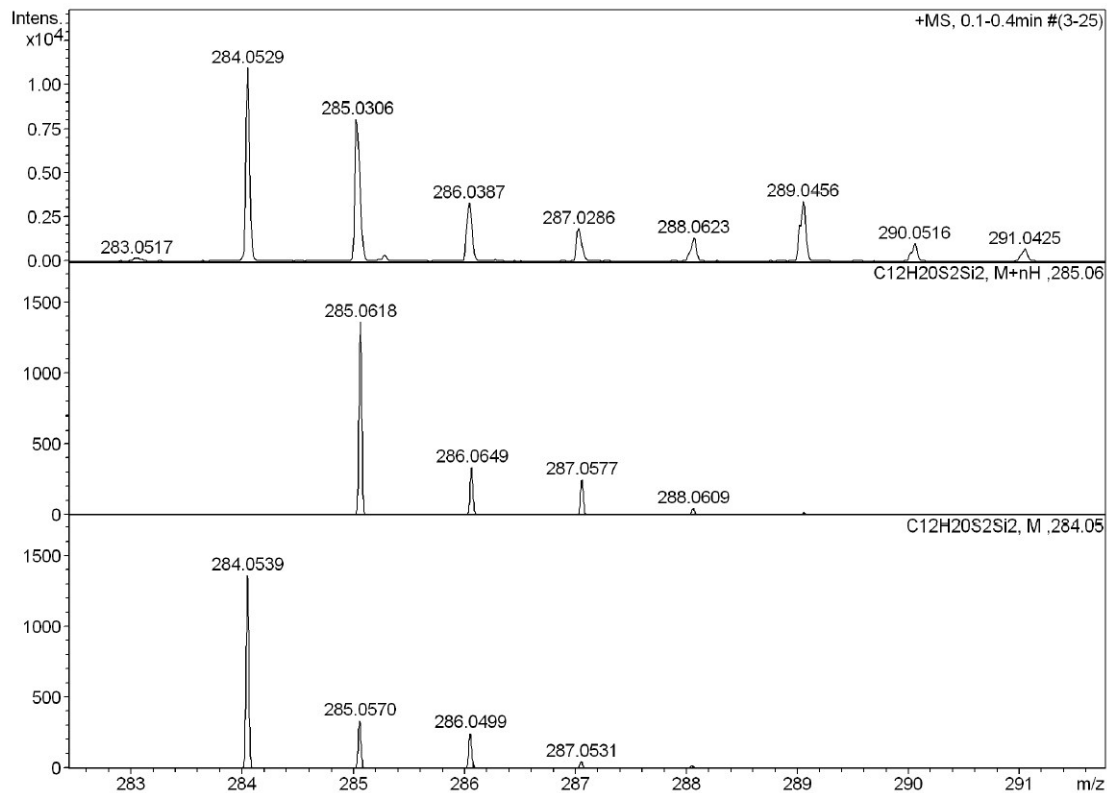

**Fig. S52.** HRMS spectrum of 2,5-bis(trimethylsilyl)thieno[3,2-b]thiophene (TMSTT) (APCI, positive). Top: obsd. Bottom: sim.

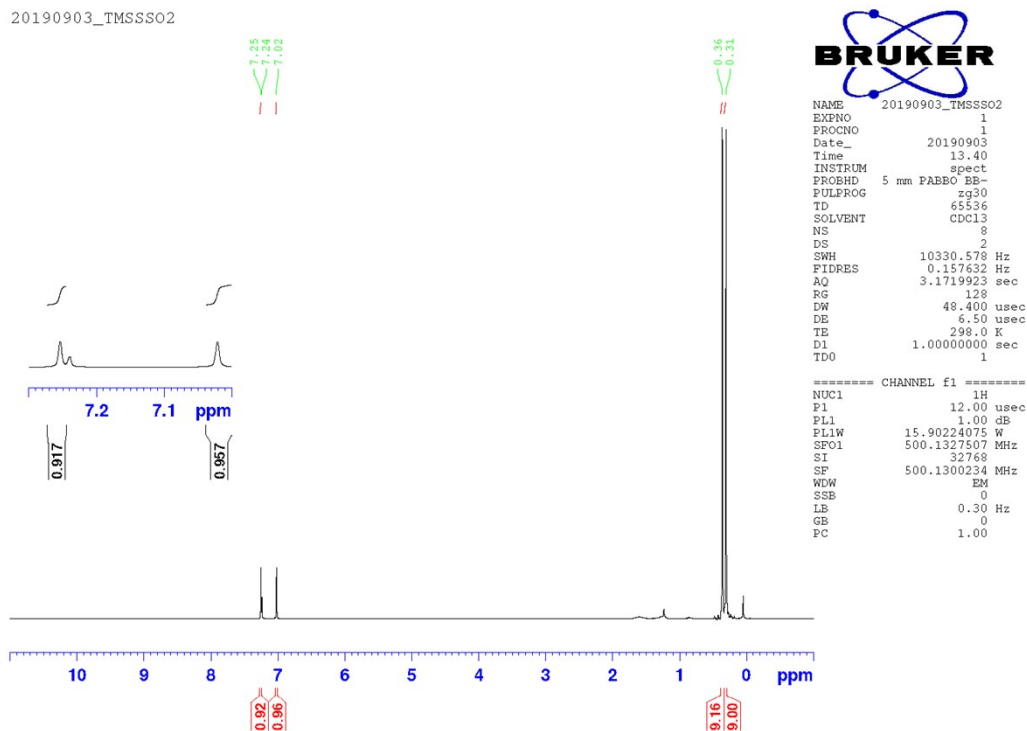

**Fig. S53.**  $^1\text{H}$  NMR spectrum of 2,5-bis(trimethylsilyl)thieno[3,2-b]thiophene-1,1-dioxide (TMSTTO2) in  $\text{CDCl}_3$ .

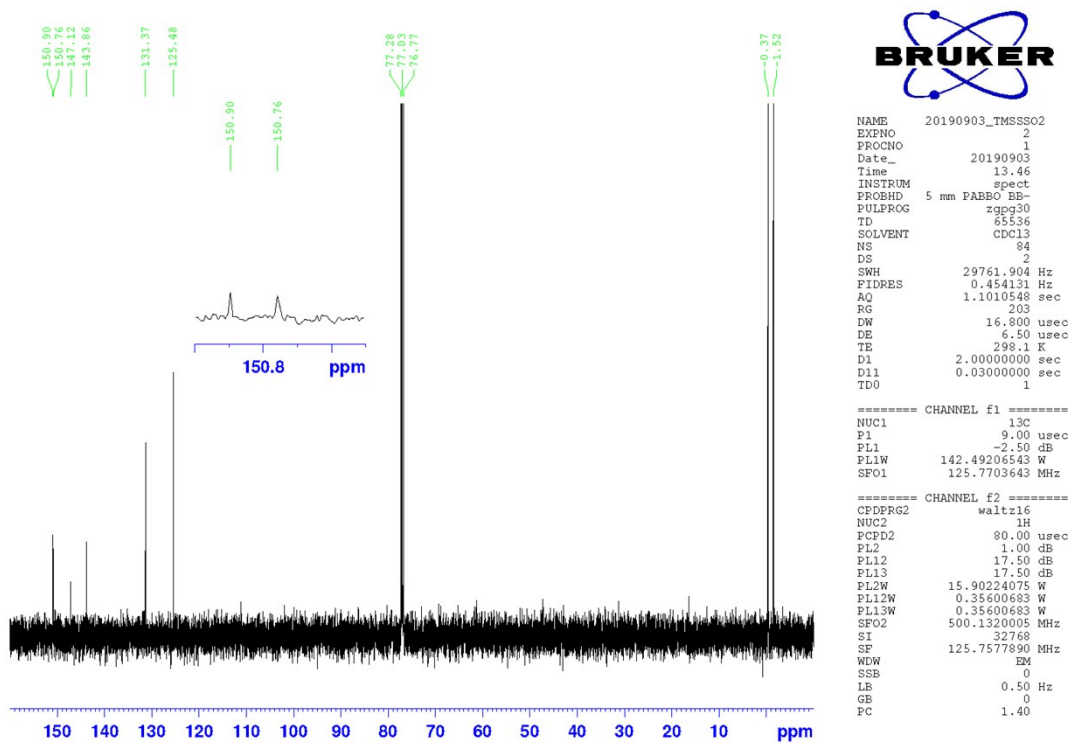

**Fig. S54.**  $^{13}\text{C}$  NMR spectrum of 2,5-bis(trimethylsilyl)thieno[3,2-b]thiophene-1,1-dioxide (TMSTTO2) in  $\text{CDCl}_3$ .

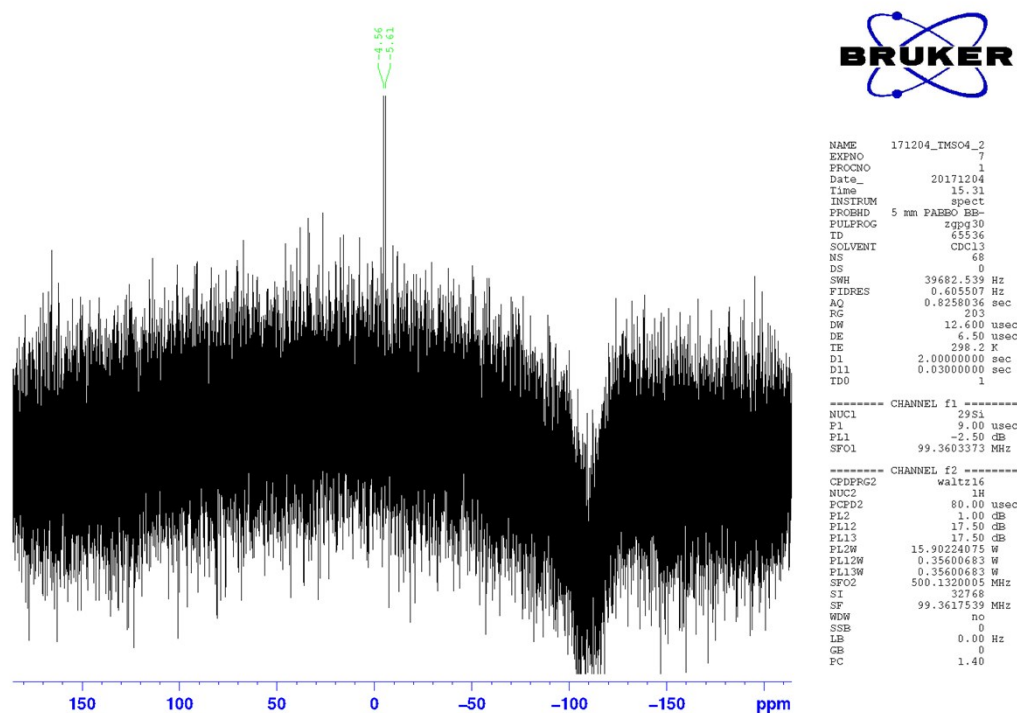

**Fig. S55.**  $^{29}\text{Si}$  NMR spectrum of 2,5-bis(trimethylsilyl)thieno[3,2-b]thiophene-1,1-dioxide (TMSTTO2) in  $\text{CDCl}_3$ .

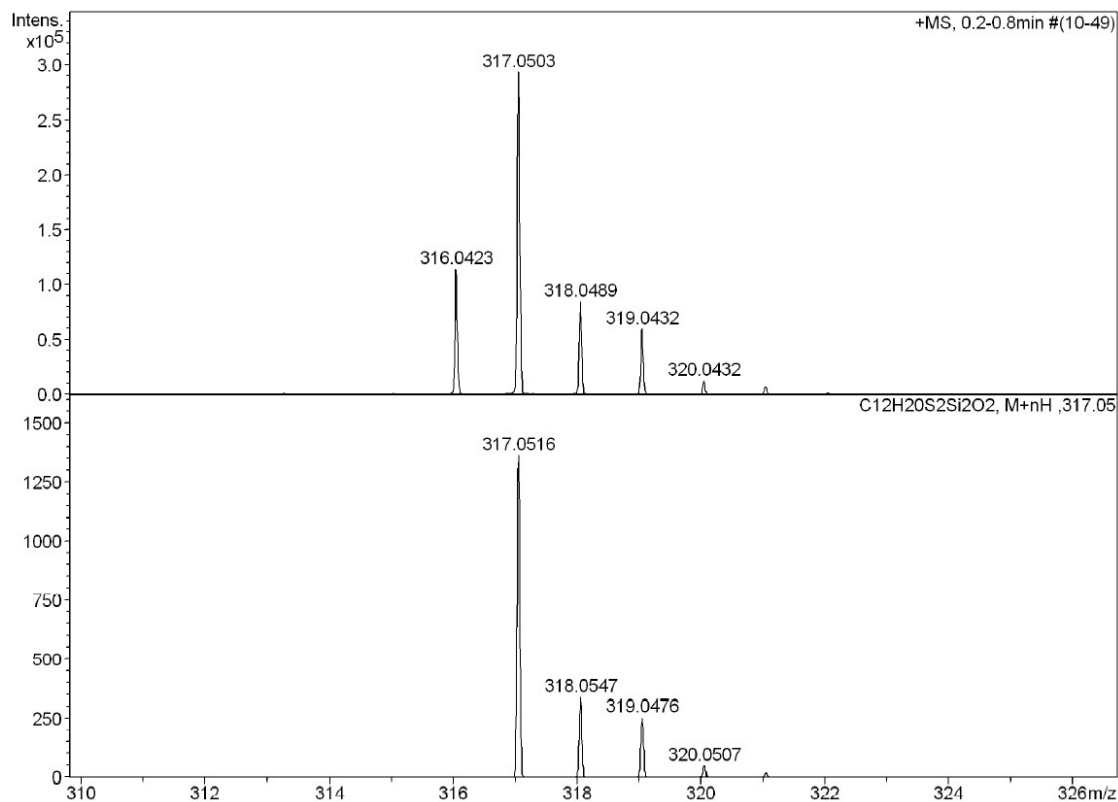

**Fig. S56.** HRMS spectrum of 2,5-bis(trimethylsilyl)thieno[3,2-b]thiophene-1,1-dioxide (TMSTTO2) (APCI, positive). Top: obsd. Bottom: sim.

### 3. Details of X-Ray Diffraction Studies

#### a. Crystal Data

Table S1. Crystal Data

| Compound                             |          | C14TTO2                                                       | C18TTO2·THF                                                   | C22TTO2·toluene                                               |
|--------------------------------------|----------|---------------------------------------------------------------|---------------------------------------------------------------|---------------------------------------------------------------|
| CCDC #                               |          | 2056315                                                       | 2056316                                                       | 2079089                                                       |
| Temperature                          |          | 100 K                                                         | 120 K                                                         | 100 K                                                         |
| Empirical formula                    |          | C48 H86 O2 S2 Si2                                             | C64 H118 O3 S2 Si2                                            | C165 H292 O4 S4 Si4                                           |
| Crystal shape                        |          | prism                                                         | prism                                                         | plate                                                         |
| Crystal color                        |          | colorless                                                     | colorless                                                     | colorless                                                     |
| Crystal size                         |          | 0.32 x 0.32 x 0.30 mm <sup>3</sup>                            | 0.35 x 0.25 x 0.10 mm <sup>3</sup>                            | 0.35 x 0.18 x 0.02 mm <sup>3</sup>                            |
| Formula weight / g mol <sup>-1</sup> |          | 815.46                                                        | 1055.88                                                       | 2580.57                                                       |
| Crystal system                       |          | Monoclinic                                                    | Triclinic                                                     | Triclinic                                                     |
| Space group                          |          | C 2/c                                                         | P -1                                                          | P -1                                                          |
| Z                                    |          | 4                                                             | 4                                                             | 1                                                             |
| Calculated density                   |          | 1.100 Mg/m <sup>3</sup>                                       | 1.069 Mg/m <sup>3</sup>                                       | 1.054 Mg/m <sup>3</sup>                                       |
| Cell parameter                       | <i>a</i> | 28.057(16) Å                                                  | 14.1686(8) Å                                                  | 14.8902(6) Å                                                  |
|                                      | <i>b</i> | 10.526(5) Å                                                   | 18.6421(10) Å                                                 | 16.5950(7) Å                                                  |
|                                      | <i>c</i> | 18.076(10) Å                                                  | 26.5403(14) Å                                                 | 19.6033(8) Å                                                  |
|                                      | $\alpha$ | 90°                                                           | 92.576(3)°                                                    | 102.529(2)°                                                   |
|                                      | $\beta$  | 112.752(5)°                                                   | 97.481(3)°                                                    | 99.392(2)°                                                    |
|                                      | $\gamma$ | 90°                                                           | 108.562(3)°                                                   | 115.908(2)°                                                   |
|                                      | <i>V</i> | 4923(5) Å <sup>3</sup>                                        | 6561.0(6) Å <sup>3</sup>                                      | 4065.7(3) Å <sup>3</sup>                                      |
| F(000)                               |          | 1800                                                          | 2344                                                          | 1434                                                          |
| Absorption coefficient               |          | 0.191 mm <sup>-1</sup>                                        | 1.379 mm <sup>-1</sup>                                        | 1.181 mm <sup>-1</sup>                                        |
| $\theta$ range for collection (deg)  |          | 3.053 to 27.533° (Mo)                                         | 4.017 to 60.000° (Cu)                                         | 4.120 to 77.490° (Cu)                                         |
| Index ranges                         |          | -36 ≤ <i>h</i> ≤ 36, -13 ≤ <i>k</i> ≤ 13, -23 ≤ <i>l</i> ≤ 23 | -15 ≤ <i>h</i> ≤ 15, -20 ≤ <i>k</i> ≤ 20, -29 ≤ <i>l</i> ≤ 29 | -18 ≤ <i>h</i> ≤ 17, -20 ≤ <i>k</i> ≤ 20, -23 ≤ <i>l</i> ≤ 24 |
| Reflections collected                |          | 25400                                                         | 44497                                                         | 35974                                                         |
| Independent reflections              |          | 5660 [R(int) = 0.0272]                                        | 18773 [R(int) = 0.0572]                                       | 16117 [R(int) = 0.0354]                                       |
| Completeness                         |          | 99.7 %                                                        | 96.4 %                                                        | 97.3 %                                                        |
| Goodness-of-fit on F <sup>2</sup>    |          | 1.136                                                         | 1.021                                                         | 1.018                                                         |
| Final R indices [I > 2σ(I)]          |          | R1 = 0.0502, wR2 = 0.1233                                     | R1 = 0.1304, wR2 = 0.3267                                     | R1 = 0.0998, wR2 = 0.2724                                     |
| R indices (all data)                 |          | R1 = 0.0540, wR2 = 0.1255                                     | R1 = 0.1654, wR2 = 0.3578                                     | R1 = 0.1114, wR2 = 0.2839                                     |

(a)

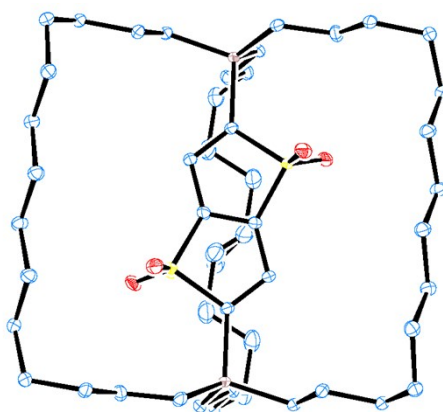

(b)

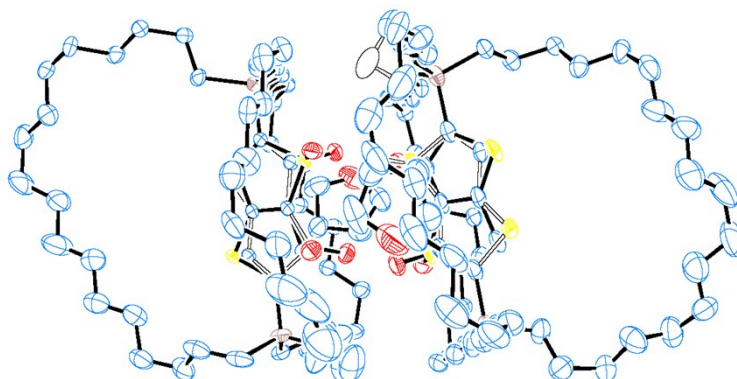

(c)

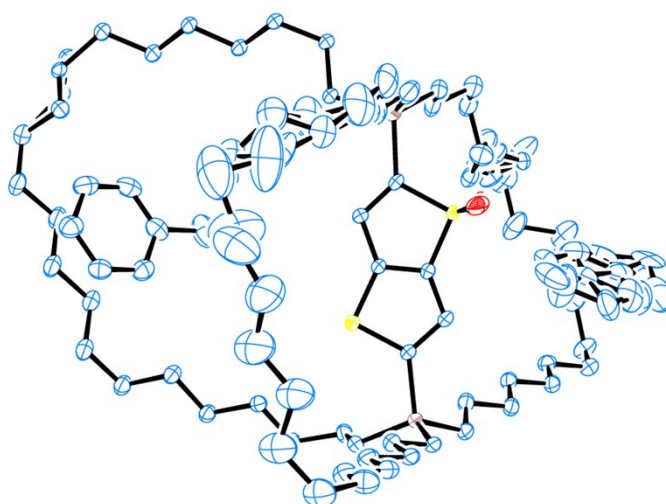

**Fig. S57.** ORTEP drawing (30% thermal ellipsoids) of molecular structures determined by X-ray crystallography (Hydrogen atoms are omitted for clarity. Disorder was indicated.): (a) **C14TTO2**; (b) **C18TTO2·THF**; (c) **C22TTO2·toluene**.

(a)

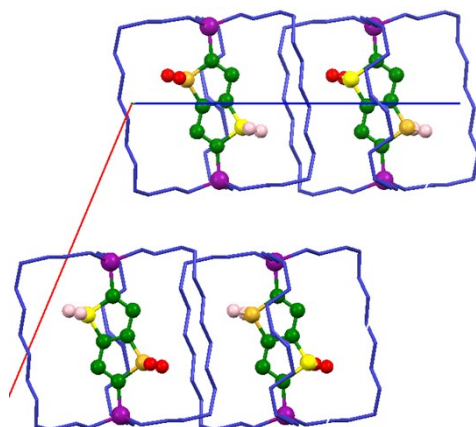

(b)

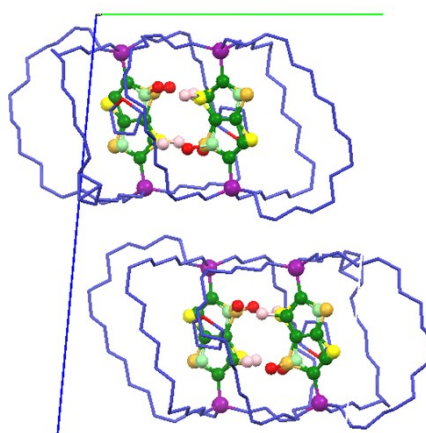

(c)

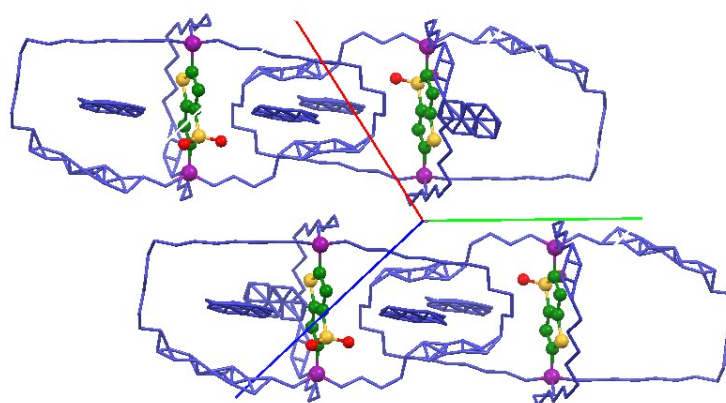

**Fig. S58.** Packing diagram of single crystals determined by X-ray crystallography: (a) C14TTO2; (b) C18TTO2·THF; (c) C22TTO2·toluene.

(a)

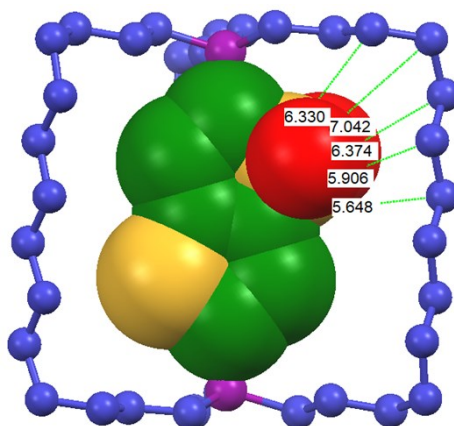

(b)

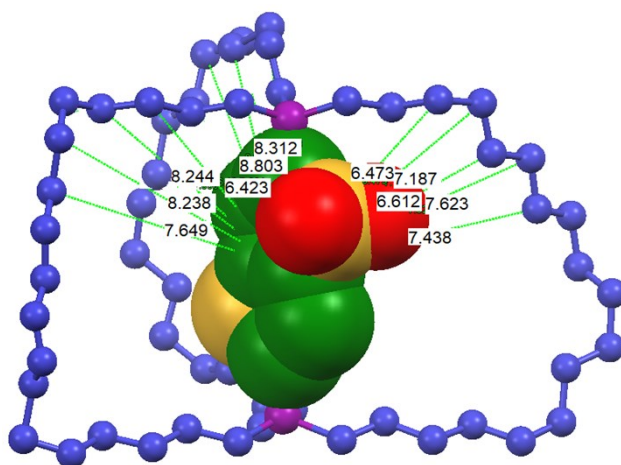

(c)

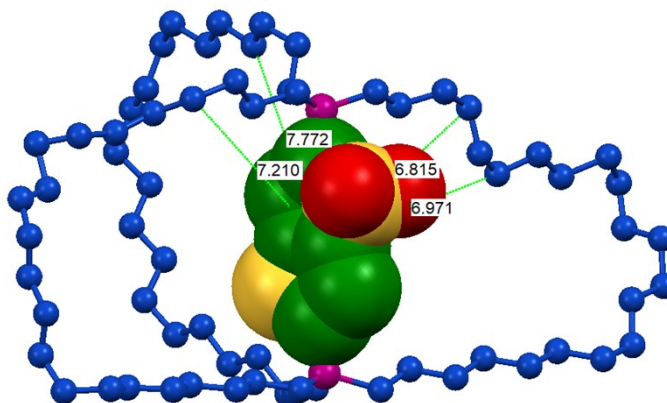

**Fig. S59.** Distances between center of the molecule (X) and cage carbon (C) that is contactable with oxygen (O) of the rotating TTO2 moiety: (a) **C14TTO2** crystal; (b) **C18TTO2·THF** crystal; (c) **C22TTO2·toluene** crystal.

#### 4. Details of DSC Studies

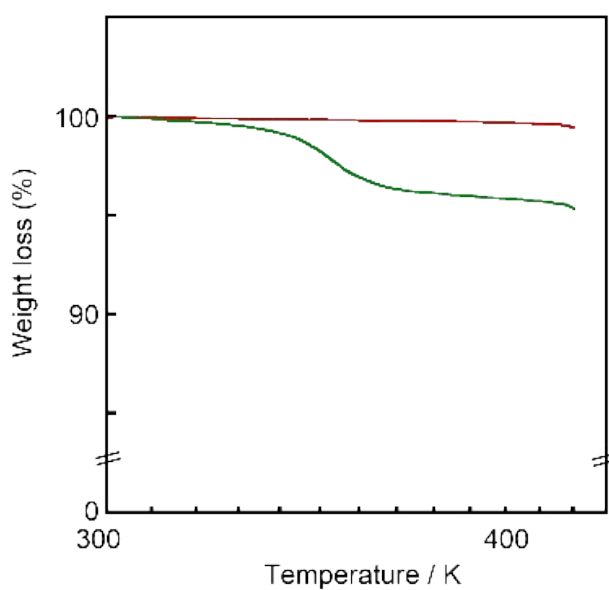

**Fig. S60.** Thermogravimetric analysis (TGA) data for **C18TTO2·THF** crystals (green line) and **C18TTO2** powders after melting (red line).

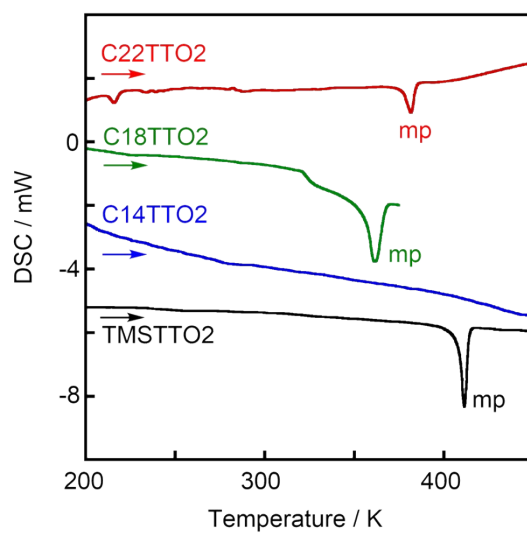

**Fig. S61.** DSC charts for powdered samples.

## 5. Details of Fluorescence Studies

**Fluorescence spectra studies** Sample solutions for fluorescence studies were thoroughly degassed using several freeze–pump–thaw sequences. The quantum yields of the solutions were determined by comparison with the fluorescence intensity of naphthalene in hexane ( $\Phi = 0.10$ , ref Weber, G.; Teale, F. W. J. *Trans. Faraday Soc.* **1957**, *53*, 646.) under irradiation by 340 nm light. The absolute quantum yields of the powders were determined using a spectrometer equipped with an integrating sphere. Lifetimes were measured under irradiation by 340 nm light (LED) with a time-correlated single-photon counting apparatus.

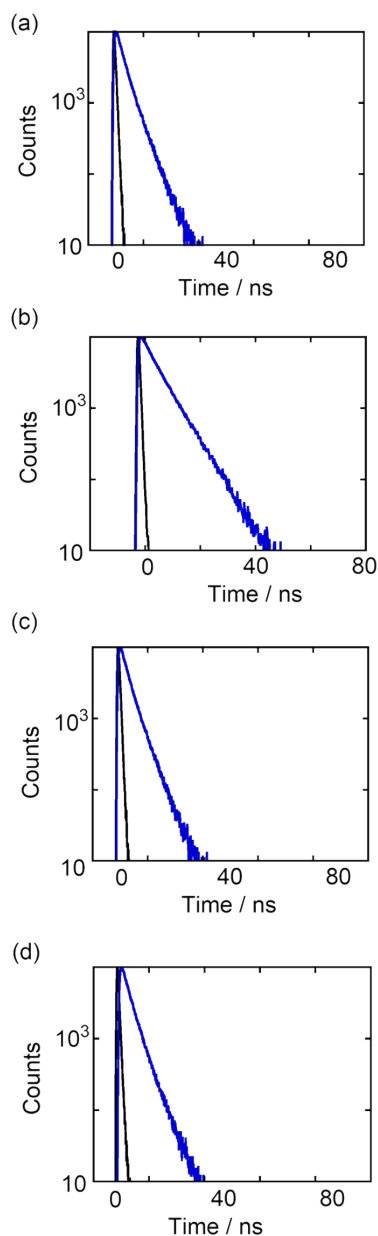

**Fig. S62.** Fluorescence life-time measurements for powdered silylthienothiophene-dioxide: (a) **TMSTTO2** (as a control), (b) **C14TTO2**, (c) **C18TTO2**, and (d) **C22TTO2**.

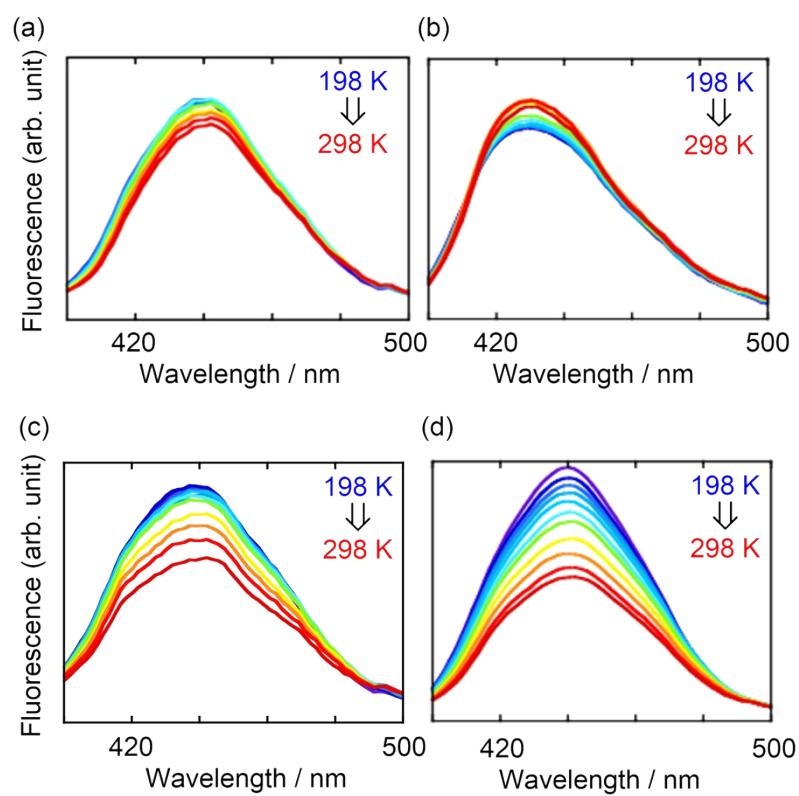

**Fig. S63.** Temperature dependent fluorescence spectra of powdered silylthienothiophene-dioxide: (a) TMSTTO2 (as a control), (b) C14TTO2, (c) C18TTO2, and (d) C22TTO2.

## 6. Details of Temperature Dependent Dielectric Relaxation Studies

**Dielectric relaxation spectra studies** Dielectric relaxation studies were carried out by building parallel plate capacitors with a dielectric placed between the plates. The dielectric spectra were measured using an impedance meter.

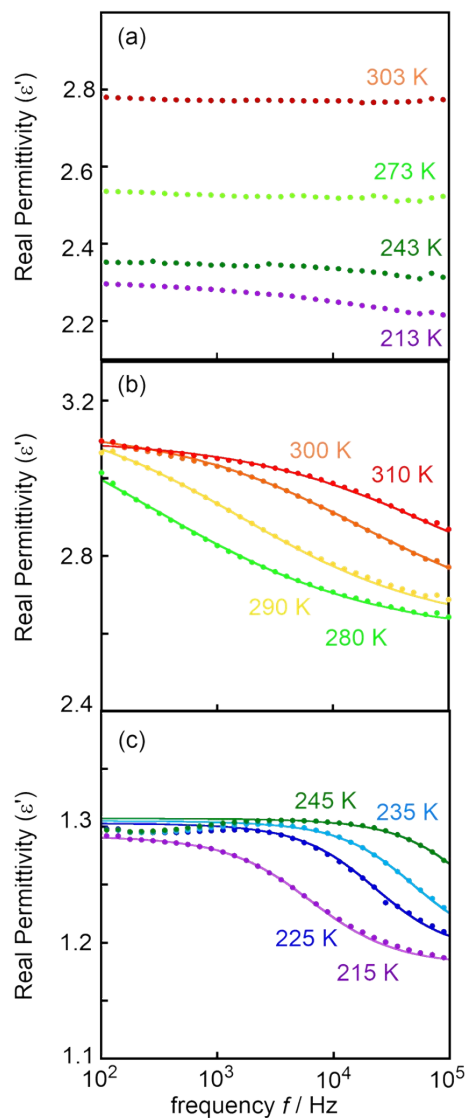

**Fig. S64.** Dielectric spectra (real permittivity ( $\epsilon'$ )) of (a) **C14TTO2** powder, (b) **C18TTO2** powder, and (c) **C22TTO2** powder: dotted lines, observed data; solid lines, fitting lines calculated using Cole–Cole model (eq. 2,  $\alpha = 0.4$  for 280 K,  $\alpha = 0.45$  for 290, 300, and 310 K for **C18TTO2**;  $\alpha = 0.78$  for 215 K,  $\alpha = 0.83$  for 225, 235, and 245 K for **C22TTO2**).

(a)

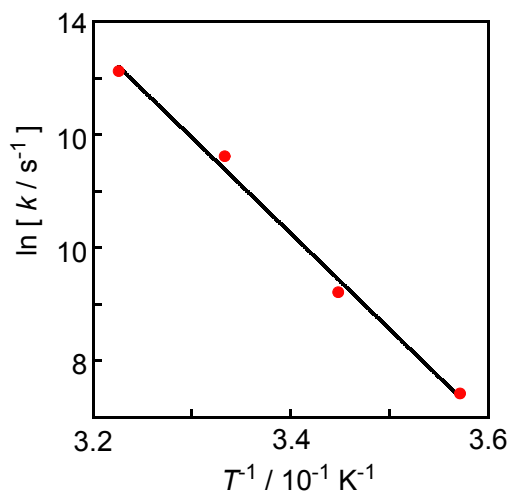

(b)

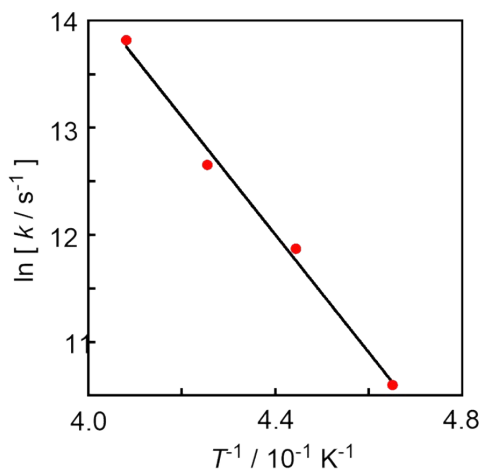

**Fig. S65.** An Arrhenius plot of temperature dependent reciprocal relaxation time determined by VT dielectric relaxation spectra for powdered (a) **C18TTO2** (The slope and the intercept of the fitting line are  $-16947 \pm 942$ ,  $67.9 \pm 3.2$ , respectively. The activation energy and the frequency factor were estimated to be  $33.7 \pm 0.19$  kcal/mol and  $(3.31 \pm 4.8) \cdot 10^{29}$ , respectively.) and (b) **C22TTO2** (The slope and the intercept of the fitting line are  $-5498.3 \pm 325$ ,  $36.20 \pm 1.4$ , respectively. The activation energy and the frequency factor were estimated to be  $10.9 \pm 0.68$  kcal/mol and  $(5.2 \pm 16.5) \cdot 10^{15}$ , respectively.).

## 7. Details of DFT Calculations

All calculations were carried out using Gaussian 16 (Revision C.01) program packages<sup>S1</sup> at the Research Center for Computational Science, Okazaki, Japan

S1: Gaussian 16, Revision C.01,

M. J. Frisch, G. W. Trucks, H. B. Schlegel, G. E. Scuseria, M. A. Robb, J. R. Cheeseman, G. Scalmani, V. Barone, G. A. Petersson, H. Nakatsuji, X. Li, M. Caricato, A. V. Marenich, J. Bloino, B. G. Janesko, R. Gomperts, B. Mennucci, H. P. Hratchian, J. V. Ortiz, A. F. Izmaylov, J. L. Sonnenberg, D. Williams-Young, F. Ding, F. Lipparini, F. Egidi, J. Goings, B. Peng, A. Petrone, T. Henderson, D. Ranasinghe, V. G. Zakrzewski, J. Gao, N. Rega, G. Zheng, W. Liang, M. Hada, M. Ehara, K. Toyota, R. Fukuda, J. Hasegawa, M. Ishida, T. Nakajima, Y. Honda, O. Kitao, H. Nakai, T. Vreven, K. Throssell, J. A. Montgomery, Jr., J. E. Peralta, F. Ogliaro, M. J. Bearpark, J. J. Heyd, E. N. Brothers, K. N. Kudin, V. N. Staroverov, T. A. Keith, R. Kobayashi, J. Normand, K. Raghavachari, A. P. Rendell, J. C. Burant, S. S. Iyengar, J. Tomasi, M. Cossi, J. M. Millam, M. Klene, C. Adamo, R. Cammi, J. W. Ochterski, R. L. Martin, K. Morokuma, O. Farkas, J. B. Foresman, and D. J. Fox, Gaussian, Inc., Wallingford CT, 2019.

**Table S2.** Optimized Structural Coordinate and its Total Energy for **TMSTTO2** at B3LYP/6-31G(d) level

total energy: = -1995.1241714 hartree (NImag = 0)

| Center Number | Atomic Number | Atomic Type | Coordinates (Angstroms) |           |           |
|---------------|---------------|-------------|-------------------------|-----------|-----------|
|               |               |             | X                       | Y         | Z         |
| 1             | 14            | 0           | -4.093478               | 0.464543  | 0.000199  |
| 2             | 14            | 0           | 4.412820                | -0.004557 | 0.000343  |
| 3             | 16            | 0           | -1.350402               | -1.275756 | -0.000092 |
| 4             | 8             | 0           | -1.601188               | -1.981065 | 1.268041  |
| 5             | 8             | 0           | -1.602755               | -1.981375 | -1.267741 |
| 6             | 16            | 0           | 1.657012                | 1.625026  | -0.000376 |
| 7             | 6             | 0           | -2.200536               | 0.338924  | -0.000091 |
| 8             | 6             | 0           | -1.264739               | 1.314399  | -0.000528 |
| 9             | 6             | 0           | 0.117932                | 0.839215  | -0.000820 |
| 10            | 6             | 0           | 0.278894                | -0.522691 | -0.000826 |
| 11            | 6             | 0           | 1.622031                | -0.961948 | -0.000383 |
| 12            | 6             | 0           | 2.522337                | 0.089507  | -0.000291 |
| 13            | 1             | 0           | -1.509535               | 2.372487  | -0.000738 |
| 14            | 1             | 0           | 1.924711                | -2.002733 | -0.000473 |
| 15            | 6             | 0           | -4.740645               | -0.385744 | 1.555283  |
| 16            | 6             | 0           | -4.521681               | 2.306644  | 0.000949  |
| 17            | 6             | 0           | -4.741512               | -0.384556 | -1.555162 |
| 18            | 6             | 0           | 5.076284                | 0.853644  | 1.548875  |
| 19            | 6             | 0           | 5.076941                | 0.854167  | -1.547669 |
| 20            | 6             | 0           | 4.884637                | -1.833603 | -0.000433 |
| 21            | 1             | 0           | 4.784287                | 1.909981  | 1.583056  |
| 22            | 1             | 0           | 6.172178                | 0.813248  | 1.577132  |
| 23            | 1             | 0           | 4.699842                | 0.375959  | 2.460569  |
| 24            | 1             | 0           | -4.424544               | 0.146611  | 2.459614  |
| 25            | 1             | 0           | 4.786010                | 1.910812  | -1.581309 |
| 26            | 1             | 0           | 6.172823                | 0.812765  | -1.576032 |
| 27            | 1             | 0           | -5.836850               | -0.424933 | 1.551782  |
| 28            | 1             | 0           | -4.359666               | -1.409793 | 1.628305  |
| 29            | 1             | 0           | -4.130315               | 2.817521  | 0.888447  |
| 30            | 1             | 0           | 4.700036                | 0.377324  | -2.459608 |
| 31            | 1             | 0           | 5.976025                | -1.942037 | -0.000227 |
| 32            | 1             | 0           | -5.610627               | 2.438439  | 0.001856  |
| 33            | 1             | 0           | 4.503280                | -2.353823 | 0.885707  |
| 34            | 1             | 0           | -4.131740               | 2.817915  | -0.886949 |
| 35            | 1             | 0           | 4.503703                | -2.352394 | -0.887600 |
| 36            | 1             | 0           | -4.360384               | -1.408458 | -1.629351 |
| 37            | 1             | 0           | -5.837709               | -0.423927 | -1.550857 |
| 38            | 1             | 0           | -4.426206               | 0.148685  | -2.459252 |

Dipole moment (field-independent basis, Debye):

X= 2.2425 Y= 3.8895 Z= 0.0001 Tot= 4.4896
